# Supplementary material for: Host and Cropping System Shape the Fusarium Population: 3ADON-Producers Are Ubiquitous in Wheat Whereas NIV-Producers Are More Prevalent in Rice
Source: Toxins (Basel). 2018 Mar 8;10(3):115. doi: 10.3390/toxins10030115 (PMC5869403; doi:10.3390/toxins10030115)
Supplement: Supplementary file 1 [file toxins-10-00115-s001.xlsx]

## Sheet: Sheet1
Table S1 Strains information in this study
Strain No	Province	Sampling sites	Host	Species	Chemotype	MLGT	EF1α
IPP14190	Sichuan	Jianyang	rice	F. asiaticum	NIV	x
IPP14191	Sichuan	Jianyang	rice	F. asiaticum	NIV	x
IPP14192	Sichuan	Jianyang	rice	F. asiaticum	NIV	x
IPP14193	Sichuan	Jianyang	rice	F. graminearum	15ADON	x
IPP14194	Sichuan	Jianyang	rice	F. meridionale	NIV	x
IPP14195	Sichuan	Jianyang	rice	F. asiaticum	NIV	x
IPP14196	Sichuan	Jianyang	rice	F. asiaticum	NIV	x
IPP14197	Sichuan	Jianyang	rice	F. meridionale	NIV	x
IPP14198	Sichuan	Jianyang	rice	F. asiaticum	NIV	x
IPP14199	Sichuan	Jianyang	rice	F. asiaticum	NIV	x
IPP14200	Sichuan	Jianyang	rice	F. graminearum	15ADON	x
IPP14201	Sichuan	Jianyang	rice	F. graminearum	15ADON	x
IPP14202	Sichuan	Jianyang	rice	F. asiaticum	NIV	x
IPP14203	Sichuan	Jianyang	rice	F. asiaticum	NIV	x
IPP14204	Sichuan	Jianyang	rice	F. asiaticum	NIV	x
IPP14205	Sichuan	Jianyang	rice	F. asiaticum	NIV	x
IPP14206	Sichuan	Jianyang	rice	F. asiaticum	NIV	x
IPP14207	Sichuan	Jianyang	rice	F. asiaticum	NIV	x
IPP14208	Sichuan	Jianyang	rice	F. asiaticum	NIV	x
IPP14209	Sichuan	Jianyang	rice	F. asiaticum	NIV	x
IPP14210	Sichuan	Jianyang	rice	F. asiaticum	NIV	x
IPP14211	Sichuan	Jianyang	rice	F. graminearum	15ADON	x
IPP14212	Sichuan	Jianyang	rice	F. asiaticum	NIV	x
IPP14213	Sichuan	Jianyang	rice	F. asiaticum	NIV	x
IPP14214	Sichuan	Jianyang	rice	F. asiaticum	NIV	x
IPP14215	Sichuan	Jianyang	rice	F. graminearum	15ADON	x
IPP14216	Sichuan	Jianyang	rice	F. proliferatum			x
IPP14217	Sichuan	Jianyang	rice	F. asiaticum	NIV	x
IPP14218	Sichuan	Jianyang	rice	F. asiaticum	NIV	x
IPP14219	Sichuan	Jianyang	rice	F. proliferatum			x
IPP14220	Sichuan	Jianyang	rice	F. graminearum	15ADON	x
IPP14221	Sichuan	Jianyang	rice	F. asiaticum	NIV	x
IPP14222	Sichuan	Jianyang	rice	F. asiaticum	NIV	x
IPP14223	Sichuan	Jianyang	rice	F. graminearum	15ADON	x
IPP14224	Sichuan	Jianyang	rice	F. asiaticum	NIV	x
IPP14225	Sichuan	Jianyang	rice	F. asiaticum	NIV	x
IPP14226	Sichuan	Jianyang	rice	F. concentricum			x
IPP14227	Sichuan	Jianyang	rice	F. asiaticum	NIV	x
IPP14228	Sichuan	Jianyang	rice	F. asiaticum	NIV	x
IPP14229	Sichuan	Jianyang	rice	F. graminearum	15ADON	x
IPP14230	Sichuan	Jianyang	rice	F. asiaticum	NIV	x
IPP14231	Sichuan	Jianyang	rice	F. graminearum	15ADON	x
IPP14232	Sichuan	Jianyang	rice	F. asiaticum	NIV	x
IPP14233	Sichuan	Jianyang	rice	F. asiaticum	NIV	x
IPP14234	Sichuan	Jianyang	rice	F. graminearum	15ADON	x
IPP14235	Sichuan	Jianyang	rice	F. asiaticum	NIV	x
IPP14236	Sichuan	Jianyang	rice	F. asiaticum	NIV	x
IPP14237	Sichuan	Jianyang	rice	F. graminearum	15ADON	x
IPP14238	Sichuan	Jianyang	rice	F. graminearum	15ADON	x
IPP14239	Sichuan	Jianyang	rice	F. asiaticum	NIV	x
IPP14240	Sichuan	Jianyang	rice	F. asiaticum	NIV	x
IPP14241	Sichuan	Jianyang	rice	F. asiaticum	NIV	x
IPP14242	Sichuan	Jianyang	rice	F. asiaticum	NIV	x
IPP14243	Sichuan	Jianyang	rice	F. asiaticum	NIV	x
IPP14244	Sichuan	Jianyang	rice	F. asiaticum	NIV	x
IPP14245	Sichuan	Jianyang	rice	F. asiaticum	NIV	x
IPP14246	Sichuan	Jianyang	rice	F. graminearum	15ADON	x
IPP14247	Sichuan	Jianyang	rice	F. asiaticum	NIV	x
IPP14248	Sichuan	Jianyang	rice	F. asiaticum	NIV	x
IPP14249	Sichuan	Jianyang	rice	F. asiaticum	NIV	x
IPP14250	Sichuan	Jianyang	rice	F. asiaticum	NIV	x
IPP14251	Sichuan	Jianyang	rice	F. meridionale	NIV	x
IPP14252	Sichuan	Jianyang	rice	F. graminearum	15ADON	x
IPP14253	Sichuan	Jianyang	rice	F. graminearum	15ADON	x
IPP14254	Sichuan	Jianyang	rice	F. asiaticum	NIV	x
IPP14255	Sichuan	Jianyang	rice	F. asiaticum	NIV	x
IPP14256	Sichuan	Jianyang	rice	F. concentricum			x
IPP14257	Sichuan	Jianyang	rice	F. graminearum	15ADON	x
IPP14258	Sichuan	Jianyang	rice	F. graminearum	15ADON	x
IPP14259	Sichuan	Jianyang	rice	F. asiaticum	NIV	x
IPP14260	Sichuan	Jianyang	rice	F. asiaticum	NIV	x
IPP14261	Sichuan	Jianyang	rice	F. concentricum			x
IPP14262	Sichuan	Jianyang	rice	F. asiaticum	NIV	x
IPP14263	Sichuan	Jianyang	rice	F. meridionale	NIV	x
IPP14264	Sichuan	Jianyang	rice	F. asiaticum	NIV	x
IPP14265	Sichuan	Jianyang	rice	F. asiaticum	NIV	x
IPP14266	Sichuan	Jianyang	rice	F. asiaticum	NIV	x
IPP14267	Sichuan	Jianyang	rice	F. asiaticum	NIV	x
IPP14268	Sichuan	Jianyang	rice	F. graminearum	15ADON	x
IPP14269	Sichuan	Jianyang	rice	F. asiaticum	NIV	x
IPP14270	Sichuan	Jianyang	rice	F. graminearum	15ADON	x
IPP14271	Sichuan	Jianyang	rice	F. asiaticum	NIV	x
IPP14272	Sichuan	Jianyang	rice	F. asiaticum	NIV	x
IPP14273	Sichuan	Jianyang	rice	F. graminearum	15ADON	x
IPP14274	Sichuan	Jianyang	rice	F. graminearum	15ADON	x
IPP14275	Sichuan	Jianyang	rice	F. meridionale	NIV	x
IPP14276	Sichuan	Jianyang	rice	F. asiaticum	NIV	x
IPP14277	Sihcuan	Mianyang	rice	F. asiaticum	NIV	x
IPP14278	Sihcuan	Mianyang	rice	F. asiaticum	NIV	x
IPP14279	Sihcuan	Mianyang	rice	F. asiaticum	NIV	x
IPP14280	Sihcuan	Mianyang	rice	F. asiaticum	NIV	x
IPP14281	Sihcuan	Mianyang	rice	F. asiaticum	NIV	x
IPP14282	Sihcuan	Mianyang	rice	F. graminearum	15ADON	x
IPP14283	Sihcuan	Mianyang	rice	F. asiaticum	NIV	x
IPP14284	Sihcuan	Mianyang	rice	F. asiaticum	NIV	x
IPP14285	Sihcuan	Mianyang	rice	F. asiaticum	NIV	x
IPP14286	Sihcuan	Mianyang	rice	F. graminearum	15ADON	x
IPP14287	Sihcuan	Mianyang	rice	F. asiaticum	NIV	x
IPP14288	Sihcuan	Mianyang	rice	F. asiaticum	NIV	x
IPP14289	Sihcuan	Mianyang	rice	F. asiaticum	NIV	x
IPP14290	Sihcuan	Mianyang	rice	F. asiaticum	NIV	x
IPP14291	Sihcuan	Mianyang	rice	F. graminearum	15ADON	x
IPP14292	Sihcuan	Mianyang	rice	F. asiaticum	NIV	x
IPP14293	Sihcuan	Mianyang	rice	F. asiaticum	NIV	x
IPP14294	Sihcuan	Mianyang	rice	F. asiaticum	NIV	x
IPP14295	Sihcuan	Mianyang	rice	F. asiaticum	NIV	x
IPP14296	Sihcuan	Mianyang	rice	F. asiaticum	NIV	x
IPP14297	Sihcuan	Mianyang	rice	F. asiaticum	NIV	x
IPP14298	Sihcuan	Mianyang	rice	F. asiaticum	NIV	x
IPP14299	Sihcuan	Mianyang	rice	F. asiaticum	NIV	x
IPP14300	Sihcuan	Mianyang	rice	F. asiaticum	NIV	x
IPP14301	Sihcuan	Mianyang	rice	F. asiaticum	NIV	x
IPP14302	Sihcuan	Mianyang	rice	F. graminearum	15ADON	x
IPP14303	Sihcuan	Mianyang	rice	F. asiaticum	NIV	x
IPP14304	Sihcuan	Mianyang	rice	F. asiaticum	NIV	x
IPP14305	Sihcuan	Mianyang	rice	F. asiaticum	NIV	x
IPP14306	Sihcuan	Mianyang	rice	F. asiaticum	NIV	x
IPP14307	Sihcuan	Mianyang	rice	F. meridionale	NIV	x
IPP14308	Sihcuan	Mianyang	rice	F. asiaticum	NIV	x
IPP14309	Sihcuan	Mianyang	rice	F. asiaticum	NIV	x
IPP14310	Sihcuan	Mianyang	rice	F. asiaticum	NIV	x
IPP14311	Sihcuan	Mianyang	rice	F. asiaticum	NIV	x
IPP14312	Sihcuan	Mianyang	rice	F. asiaticum	NIV	x
IPP14313	Sihcuan	Mianyang	rice	F. asiaticum	NIV	x
IPP14314	Sihcuan	Mianyang	rice	F. asiaticum	NIV	x
IPP14315	Sihcuan	Mianyang	rice	F. asiaticum	NIV	x
IPP14316	Sihcuan	Mianyang	rice	F. asiaticum	NIV	x
IPP14317	Sihcuan	Mianyang	rice	F. asiaticum	NIV	x
IPP14318	Sihcuan	Mianyang	rice	F. asiaticum	NIV	x
IPP14319	Sihcuan	Mianyang	rice	F. graminearum	15ADON	x
IPP14320	Sihcuan	Mianyang	rice	F. asiaticum	NIV	x
IPP14321	Sihcuan	Mianyang	rice	F. asiaticum	NIV	x
IPP14322	Sihcuan	Mianyang	rice	F. asiaticum	NIV	x
IPP14323	Sihcuan	Mianyang	rice	F. asiaticum	NIV	x
IPP14324	Sihcuan	Mianyang	rice	F. asiaticum	NIV	x
IPP14325	Sihcuan	Mianyang	rice	F. asiaticum	NIV	x
IPP14326	Sihcuan	Mianyang	rice	F. asiaticum	NIV	x
IPP14327	Sihcuan	Mianyang	rice	F. asiaticum	NIV	x
IPP14328	Sihcuan	Mianyang	rice	F. asiaticum	NIV	x
IPP14329	Sihcuan	Mianyang	rice	F. graminearum	15ADON	x
IPP14330	Sihcuan	Mianyang	rice	F. asiaticum	NIV	x
IPP14331	Sihcuan	Mianyang	rice	F. asiaticum	NIV	x
IPP14332	Sihcuan	Mianyang	rice	F. asiaticum	NIV	x
IPP14333	Sihcuan	Mianyang	rice	F. asiaticum	NIV	x
IPP14334	Sihcuan	Mianyang	rice	F. asiaticum	NIV	x
IPP14335	Sihcuan	Mianyang	rice	F. graminearum	15ADON	x
IPP14336	Sihcuan	Mianyang	rice	F. graminearum	15ADON	x
IPP14337	Sihcuan	Mianyang	rice	F. asiaticum	NIV	x
IPP14338	Sihcuan	Mianyang	rice	F. asiaticum	NIV	x
IPP14339	Sihcuan	Mianyang	rice	F. asiaticum	NIV	x
IPP14340	Sihcuan	Mianyang	rice	F. asiaticum	NIV	x
IPP14341	Sihcuan	Mianyang	rice	F. asiaticum	NIV	x
IPP14342	Sihcuan	Mianyang	rice	F. graminearum	15ADON	x
IPP14343	Sihcuan	Mianyang	rice	F. asiaticum	NIV	x
IPP14344	Sihcuan	Mianyang	rice	F. asiaticum	NIV	x
IPP14345	Sihcuan	Mianyang	rice	F. asiaticum	NIV	x
IPP14346	Sihcuan	Mianyang	rice	F. asiaticum	NIV	x
IPP14347	Sihcuan	Mianyang	rice	F. asiaticum	NIV	x
IPP14348	Sihcuan	Mianyang	rice	F. asiaticum	NIV	x
IPP14349	Sihcuan	Mianyang	rice	F. asiaticum	NIV	x
IPP14350	Sihcuan	Mianyang	rice	F. asiaticum	NIV	x
IPP14351	Sihcuan	Mianyang	rice	F. asiaticum	NIV	x
IPP14352	Sihcuan	Mianyang	rice	F. asiaticum	NIV	x
IPP14353	Sihcuan	Mianyang	rice	F. asiaticum	NIV	x
IPP14354	Sihcuan	Mianyang	rice	F. asiaticum	NIV	x
IPP14355	Sihcuan	Mianyang	rice	F. graminearum	15ADON	x
IPP14356	Sihcuan	Mianyang	rice	F. graminearum	15ADON	x
IPP14357	Sihcuan	Mianyang	rice	F. asiaticum	NIV	x
IPP14358	Sihcuan	Mianyang	rice	F. asiaticum	NIV	x
IPP14359	Sihcuan	Mianyang	rice	F. asiaticum	NIV	x
IPP14360	Sihcuan	Mianyang	rice	F. graminearum	15ADON	x
IPP14361	Sihcuan	Mianyang	rice	F. asiaticum	NIV	x
IPP14362	Sihcuan	Mianyang	rice	F. asiaticum	NIV	x
IPP14363	Sihcuan	Mianyang	rice	F. graminearum	15ADON	x
IPP14364	Sihcuan	Mianyang	rice	F. asiaticum	NIV	x
IPP14365	Sihcuan	Mianyang	rice	F. graminearum	15ADON	x
IPP14366	Sihcuan	Mianyang	rice	F. meridionale	NIV	x
IPP14367	Sihcuan	Guanghan	rice	F. asiaticum	NIV	x
IPP14368	Sihcuan	Guanghan	rice	F. asiaticum	NIV	x
IPP14369	Sihcuan	Guanghan	rice	F. asiaticum	NIV	x
IPP14370	Sihcuan	Guanghan	rice	F. asiaticum	NIV	x
IPP14371	Sihcuan	Guanghan	rice	F. asiaticum	NIV	x
IPP14372	Sihcuan	Guanghan	rice	F. asiaticum	NIV	x
IPP14373	Sihcuan	Guanghan	rice	F. asiaticum	NIV	x
IPP14374	Sihcuan	Guanghan	rice	F. asiaticum	NIV	x
IPP14375	Sihcuan	Guanghan	rice	F. asiaticum	NIV	x
IPP14376	Sihcuan	Guanghan	rice	F. asiaticum	NIV	x
IPP14377	Sihcuan	Guanghan	rice	F. asiaticum	NIV	x
IPP14378	Sihcuan	Guanghan	rice	F. asiaticum	NIV	x
IPP14379	Sihcuan	Guanghan	rice	F. asiaticum	NIV	x
IPP140017	Sihcuan	Guanghan	rice	FIESC			x
IPP14381	Sihcuan	Guanghan	rice	F. asiaticum	NIV	x
IPP14382	Sihcuan	Guanghan	rice	F. asiaticum	NIV	x
IPP14383	Sihcuan	Guanghan	rice	F. asiaticum	NIV	x
IPP14384	Sihcuan	Guanghan	rice	F. asiaticum	NIV	x
IPP14385	Sihcuan	Guanghan	rice	F. asiaticum	NIV	x
IPP14386	Sihcuan	Guanghan	rice	F. asiaticum	NIV	x
IPP14387	Sihcuan	Guanghan	rice	F. asiaticum	NIV	x
IPP14388	Sihcuan	Guanghan	rice	F. asiaticum	NIV	x
IPP14389	Sihcuan	Guanghan	rice	F. asiaticum	NIV	x
IPP14390	Sihcuan	Guanghan	rice	F. asiaticum	NIV	x
IPP14391	Sihcuan	Guanghan	rice	F. asiaticum	NIV	x
IPP14392	Sihcuan	Guanghan	rice	F. asiaticum	NIV	x
IPP14393	Sihcuan	Guanghan	rice	F. graminearum	15ADON	x
IPP14394	Sihcuan	Guanghan	rice	F. asiaticum	NIV	x
IPP14395	Sihcuan	Guanghan	rice	F. asiaticum	NIV	x
IPP14396	Sihcuan	Guanghan	rice	F. asiaticum	NIV	x
IPP14397	Sihcuan	Guanghan	rice	F. asiaticum	NIV	x
IPP14398	Sihcuan	Guanghan	rice	F. asiaticum	NIV	x
IPP14399	Sihcuan	Guanghan	rice	F. asiaticum	NIV	x
IPP14400	Sihcuan	Guanghan	rice	F. asiaticum	NIV	x
IPP14401	Sihcuan	Guanghan	rice	F. asiaticum	NIV	x
IPP14402	Sihcuan	Guanghan	rice	F. asiaticum	NIV	x
IPP14403	Sihcuan	Guanghan	rice	F. asiaticum	NIV	x
IPP14404	Sihcuan	Guanghan	rice	F. asiaticum	NIV	x
IPP14405	Sihcuan	Guanghan	rice	F. meridionale	NIV	x
IPP14406	Sihcuan	Guanghan	rice	F. asiaticum	NIV	x
IPP14407	Sihcuan	Guanghan	rice	F. asiaticum	NIV	x
IPP14408	Sihcuan	Guanghan	rice	F. asiaticum	NIV	x
IPP14409	Sihcuan	Guanghan	rice	F. asiaticum	NIV	x
IPP14410	Sihcuan	Guanghan	rice	F. asiaticum	NIV	x
IPP14411	Sihcuan	Guanghan	rice	F. asiaticum	NIV	x
IPP14412	Sihcuan	Guanghan	rice	F. asiaticum	NIV	x
IPP14413	Sihcuan	Guanghan	rice	F. asiaticum	NIV	x
IPP14414	Sihcuan	Guanghan	rice	F. asiaticum	NIV	x
IPP14415	Sihcuan	Guanghan	rice	F. asiaticum	NIV	x
IPP14416	Sihcuan	Guanghan	rice	F. asiaticum	NIV	x
IPP14417	Sihcuan	Guanghan	rice	F. asiaticum	NIV	x
IPP14418	Sihcuan	Guanghan	rice	F. asiaticum	NIV	x
IPP14419	Sichuan	Guanghan	wheat	F. asiaticum	NIV	x
IPP14420	Sichuan	Guanghan	wheat	F. asiaticum	NIV	x
IPP14421	Sichuan	Guanghan	wheat	F. asiaticum	NIV	x
IPP14422	Sichuan	Guanghan	wheat	F. asiaticum	NIV	x
IPP14423	Sichuan	Guanghan	wheat	F. asiaticum	NIV	x
IPP14424	Sichuan	Guanghan	wheat	F. asiaticum	NIV	x
IPP14425	Sichuan	Guanghan	wheat	F. asiaticum	NIV	x
IPP14426	Sichuan	Guanghan	wheat	F. asiaticum	NIV	x
IPP14427	Sichuan	Guanghan	wheat	F. asiaticum	NIV	x
IPP14428	Sichuan	Guanghan	wheat	F. asiaticum	NIV	x
IPP14429	Sichuan	Guanghan	wheat	F. asiaticum	NIV	x
IPP14430	Sichuan	Guanghan	wheat	F. asiaticum	NIV	x
IPP14431	Sichuan	Guanghan	wheat	F. asiaticum	NIV	x
IPP14432	Sichuan	Guanghan	wheat	F. asiaticum	NIV	x
IPP14433	Sichuan	Guanghan	wheat	F. asiaticum	NIV	x
IPP14434	Sichuan	Guanghan	wheat	F. asiaticum	NIV	x
IPP14435	Sichuan	Guanghan	wheat	F. asiaticum	NIV	x
IPP14436	Sichuan	Guanghan	wheat	F. asiaticum	NIV	x
IPP14437	Sichuan	Guanghan	wheat	F. asiaticum	NIV	x
IPP14438	Sichuan	Guanghan	wheat	F. asiaticum	NIV	x
IPP14439	Sichuan	Guanghan	wheat	F. asiaticum	NIV	x
IPP14440	Sichuan	Guanghan	wheat	F. asiaticum	NIV	x
IPP14441	Sichuan	Guanghan	wheat	F. asiaticum	3ADON	x
IPP14442	Sichuan	Guanghan	wheat	F. asiaticum	NIV	x
IPP14443	Sichuan	Guanghan	wheat	F. asiaticum	NIV	x
IPP14444	Sichuan	Guanghan	wheat	F. asiaticum	NIV	x
IPP14445	Sichuan	Guanghan	wheat	F. asiaticum	NIV	x
IPP14446	Sichuan	Guanghan	wheat	F. asiaticum	NIV	x
IPP14447	Sichuan	Guanghan	wheat	F. asiaticum	NIV	x
IPP14448	Sichuan	Guanghan	wheat	F. asiaticum	NIV	x
IPP14449	Sichuan	Guanghan	wheat	F. asiaticum	NIV	x
IPP14450	Sichuan	Guanghan	wheat	F. graminearum	15ADON	x
IPP14451	Sichuan	Guanghan	wheat	F. asiaticum	NIV	x
IPP14452	Sichuan	Guanghan	wheat	F. asiaticum	NIV	x
IPP14453	Sichuan	Guanghan	wheat	F. asiaticum	NIV	x
IPP14454	Sichuan	Guanghan	wheat	F. asiaticum	NIV	x
IPP14455	Sichuan	Guanghan	wheat	F. asiaticum	NIV	x
IPP14456	Sichuan	Guanghan	wheat	F. asiaticum	NIV	x
IPP14457	Sichuan	Guanghan	wheat	F. asiaticum	NIV	x
IPP14458	Sichuan	Mianyang	wheat	F. asiaticum	NIV	x
IPP14459	Sichuan	Mianyang	wheat	F. nygamai			x
IPP14460	Sichuan	Mianyang	wheat	F. asiaticum	NIV	x
IPP14461	Sichuan	Mianyang	wheat	F. asiaticum	NIV	x
IPP14462	Sichuan	Mianyang	wheat	F. asiaticum	NIV	x
IPP14463	Sichuan	Mianyang	wheat	F. asiaticum	NIV	x
IPP14464	Sichuan	Mianyang	wheat	F. graminearum	15ADON	x
IPP14465	Sichuan	Mianyang	wheat	F. graminearum	15ADON	x
IPP14466	Sichuan	Mianyang	wheat	F. asiaticum	NIV	x
IPP14467	Sichuan	Mianyang	wheat	F. asiaticum	NIV	x
IPP14468	Sichuan	Mianyang	wheat	F. asiaticum	NIV	x
IPP14469	Sichuan	Mianyang	wheat	F. asiaticum	NIV	x
IPP14470	Sichuan	Mianyang	wheat	F. asiaticum	15ADON	x
IPP14471	Sichuan	Mianyang	wheat	F. asiaticum	NIV	x
IPP14472	Sichuan	Mianyang	wheat	F. graminearum	15ADON	x
IPP14473	Sichuan	Mianyang	wheat	F. asiaticum	NIV	x
IPP14474	Sichuan	Mianyang	wheat	F. asiaticum	NIV	x
IPP14475	Sichuan	Mianyang	wheat	F. asiaticum	3ADON	x
IPP14476	Sichuan	Mianyang	wheat	F. asiaticum	3ADON	x
IPP14477	Sichuan	Mianyang	wheat	F. asiaticum	NIV	x
IPP14478	Sichuan	Mianyang	wheat	F. graminearum	15ADON	x
IPP14479	Sichuan	Mianyang	wheat	F. graminearum	15ADON	x
IPP14480	Sichuan	Mianyang	wheat	F. graminearum	15ADON	x
IPP14481	Sichuan	Mianyang	wheat	F. graminearum	15ADON	x
IPP14482	Sichuan	Mianyang	wheat	F. asiaticum	NIV	x
IPP14483	Sichuan	Mianyang	wheat	F. graminearum	15ADON	x
IPP14484	Sichuan	Mianyang	wheat	F. graminearum	15ADON	x
IPP14485	Sichuan	Mianyang	wheat	F. asiaticum	3ADON	x
IPP14486	Sichuan	Mianyang	wheat	F. graminearum	15ADON	x
IPP14487	Sichuan	Mianyang	wheat	F. graminearum	15ADON	x
IPP14488	Sichuan	Mianyang	wheat	F. asiaticum	NIV	x
IPP14489	Sichuan	Mianyang	wheat	F. graminearum	15ADON	x
IPP14490	Sichuan	Mianyang	wheat	F. asiaticum	NIV	x
IPP14491	Sichuan	Mianyang	wheat	F. asiaticum	NIV	x
IPP14492	Sichuan	Mianyang	wheat	F. graminearum	15ADON	x
IPP14493	Sichuan	Mianyang	wheat	F. asiaticum	NIV	x
IPP14494	Sichuan	Mianyang	wheat	F. asiaticum	NIV	x
IPP14495	Sichuan	Mianyang	wheat	F. asiaticum	3ADON	x
IPP14496	Sichuan	Mianyang	wheat	F. asiaticum	NIV	x
IPP14497	Sichuan	Mianyang	wheat	F. graminearum	15ADON	x
IPP14498	Sichuan	Mianyang	wheat	F. asiaticum	NIV	x
IPP14499	Sichuan	Mianyang	wheat	F. asiaticum	NIV	x
IPP14500	Sichuan	Mianyang	wheat	F. asiaticum	3ADON	x
IPP14501	Sichuan	Jianyang	wheat	F. asiaticum	NIV	x
IPP14502	Sichuan	Jianyang	wheat	F. asiaticum	NIV	x
IPP14503	Sichuan	Jianyang	wheat	F. asiaticum	NIV	x
IPP14504	Sichuan	Jianyang	wheat	F. asiaticum	NIV	x
IPP14505	Sichuan	Jianyang	wheat	F. graminearum	15ADON	x
IPP14506	Sichuan	Jianyang	wheat	F. asiaticum	NIV	x
IPP14507	Sichuan	Jianyang	wheat	F. asiaticum	NIV	x
IPP14508	Sichuan	Jianyang	wheat	F. asiaticum	NIV	x
IPP14509	Sichuan	Jianyang	wheat	F. asiaticum	3ADON	x
IPP14510	Sichuan	Jianyang	wheat	F. asiaticum	NIV	x
IPP14511	Sichuan	Jianyang	wheat	F. graminearum	15ADON	x
IPP14512	Sichuan	Jianyang	wheat	F. asiaticum	NIV	x
IPP14513	Sichuan	Jianyang	wheat	F. asiaticum	NIV	x
IPP14514	Sichuan	Jianyang	wheat	F. asiaticum	3ADON	x
IPP14515	Sichuan	Jianyang	wheat	F. asiaticum	NIV	x
IPP14516	Sichuan	Jianyang	wheat	F. asiaticum	NIV	x
IPP14517	Sichuan	Jianyang	wheat	F. asiaticum	NIV	x
IPP14518	Sichuan	Jianyang	wheat	F. asiaticum	NIV	x
IPP14519	Sichuan	Jianyang	wheat	F. asiaticum	NIV	x
IPP14520	Sichuan	Jianyang	wheat	F. graminearum	15ADON	x
IPP14521	Sichuan	Jianyang	wheat	F. graminearum	15ADON	x
IPP14522	Sichuan	Jianyang	wheat	F. meridionale	NIV	x
IPP14107	Hubei	Xiaogan	rice	F. asiaticum	3ADON	x
IPP14114	Hubei	Xiaogan	rice	F. asiaticum	NIV	x
IPP14060	Hubei	Xiaogan	rice	F. asiaticum	3ADON	x
IPP140111	Hubei	Xiaogan	rice	FIESC			x
IPP14029	Hubei	Xiaogan	rice	F. asiaticum	NIV	x
IPP14012	Hubei	Xiaogan	rice	F. asiaticum	NIV	x
IPP14002	Hubei	Xiaogan	rice	F. asiaticum	15ADON	x
IPP14010	Hubei	Xiaogan	rice	F. asiaticum	3ADON	x
IPP14096	Hubei	Xiaogan	rice	F. asiaticum	3ADON	x
IPP14110	Hubei	Xiaogan	rice	F. asiaticum	3ADON	x
IPP14075	Hubei	Xiaogan	rice	F. asiaticum	15ADON	x
IPP14086	Hubei	Xiaogan	rice	FIESC			x
IPP14093	Hubei	Xiaogan	rice	F. tricinctum			x
IPP14077	Hubei	Xiaogan	rice	F. asiaticum	NIV	x
IPP14081	Hubei	Xiaogan	rice	F. asiaticum	NIV	x
IPP14064	Hubei	Xiaogan	rice	F. asiaticum	3ADON	x
IPP14041	Hubei	Xiaogan	rice	F. asiaticum	3ADON	x
IPP14065	Hubei	Xiaogan	rice	F. asiaticum	3ADON	x
IPP14113	Hubei	Xiaogan	rice	FIESC			x
IPP140102	Hubei	Xiaogan	rice	F. asiaticum	NIV	x
IPP14045	Hubei	Xiaogan	rice	F. asiaticum	NIV	x
IPP14042	Hubei	Xiaogan	rice	FIESC			x
IPP14074	Hubei	Xiaogan	rice	FIESC			x
IPP14025	Hubei	Xiaogan	rice	FIESC			x
IPP14013	Hubei	Xiaogan	rice	F. asiaticum	3ADON	x
IPP14053	Hubei	Xiaogan	rice	FIESC			x
IPP14048	Hubei	Xiaogan	rice	FIESC			x
IPP14100	Hubei	Xiaogan	rice	FIESC			x
IPP14067	Hubei	Xiaogan	rice	FIESC			x
IPP14047	Hubei	Xiaogan	rice	F. asiaticum	3ADON	x
IPP14063	Hubei	Xiaogan	rice	FIESC			x
IPP14018	Hubei	Xiaogan	rice	FIESC			x
IPP14019	Hubei	Xiaogan	rice	F. asiaticum	3ADON	x
IPP14080	Hubei	Xiaogan	rice	FIESC			x
IPP14057	Hubei	Xiaogan	rice	F. asiaticum	NIV	x
IPP14085	Hubei	Xiaogan	rice	FIESC			x
IPP14072	Hubei	Xiaogan	rice	F. acuminatum			x
IPP14043	Hubei	Xiaogan	rice	FIESC			x
IPP14049	Hubei	Xiaogan	rice	FIESC			x
IPP14024	Hubei	Xiaogan	rice	F. asiaticum	NIV	x
IPP14017	Hubei	Xiaogan	rice	FIESC			x
IPP14059	Hubei	Xiaogan	rice	F. kyushuense			x
IPP14083	Hubei	Xiaogan	rice	F. asiaticum	NIV	x
IPP14098	Hubei	Xiaogan	rice	F. asiaticum	3ADON	x
IPP140482	Hubei	Xiaogan	rice	FIESC			x
IPP14039	Hubei	Xiaogan	rice	F. asiaticum	3ADON	x
IPP14005	Hubei	Xiaogan	rice	F. asiaticum	3ADON	x
IPP14028	Hubei	Xiaogan	rice	F. asiaticum	3ADON	x
IPP14096	Hubei	Xiaogan	rice	F. asiaticum	NIV	x
IPP14069	Hubei	Xiaogan	rice	F. asiaticum	3ADON	x
IPP14002	Hubei	Xiaogan	rice	F. asiaticum	3ADON	x
IPP14007	Hubei	Xiaogan	rice	F. asiaticum	NIV	x
IPP141072	Hubei	Xiaogan	rice	F. asiaticum	3ADON	x
IPP14008	Hubei	Xiaogan	rice	F. asiaticum	3ADON	x
IPP140102	Hubei	Xiaogan	rice	F. asiaticum	NIV	x
IPP14013	Hubei	Xiaogan	rice	F. asiaticum	3ADON	x
IPP140182	Hubei	Xiaogan	rice	FIESC			x
IPP14022	Hubei	Xiaogan	rice	F. asiaticum	3ADON	x
IPP14024	Hubei	Xiaogan	rice	FIESC			x
IPP14021	Hubei	Xiaogan	rice	F. asiaticum	3ADON	x
IPP14027	Hubei	Xiaogan	rice	F. asiaticum	3ADON	x
IPP14030	Hubei	Xiaogan	rice	F. asiaticum	NIV	x
IPP14038	Hubei	Xiaogan	rice	F. asiaticum	NIV	x
IPP140452	Hubei	Xiaogan	rice	FIESC			x
IPP14055	Hubei	Xiaogan	rice	F. asiaticum	3ADON	x
IPP140582	Hubei	Xiaogan	rice	F. asiaticum	3ADON	x
IPP14062	Hubei	Xiaogan	rice	F. asiaticum	NIV	x
IPP140622	Hubei	Xiaogan	rice	F. asiaticum	NIV	x
IPP14066	Hubei	Xiaogan	rice	F. asiaticum	3ADON	x
IPP14068	Hubei	Xiaogan	rice	F. asiaticum	3ADON	x
IPP14076	Hubei	Xiaogan	rice	F. asiaticum	NIV	x
IPP140772	Hubei	Xiaogan	rice	F. asiaticum	NIV	x
IPP140802	Hubei	Xiaogan	rice	F. asiaticum	3ADON	x
IPP140812	Hubei	Xiaogan	rice	F. asiaticum	NIV	x
IPP14088	Hubei	Xiaogan	rice	F. asiaticum	3ADON	x
IPP14089	Hubei	Xiaogan	rice	F. asiaticum	NIV	x
IPP14090	Hubei	Xiaogan	rice	F. asiaticum	3ADON	x
IPP140972	Hubei	Xiaogan	rice	F. asiaticum	3ADON	x
IPP14092	Hubei	Xiaogan	rice	F. asiaticum	3ADON	x
IPP14104	Hubei	Xiaogan	rice	F. asiaticum	3ADON	x
IPP14106	Hubei	Xiaogan	rice	F. asiaticum	3ADON	x
IPP14109	Hubei	Xiaogan	rice	F. asiaticum	15ADON	x
IPP14116	Hubei	Xiaogan	rice	F. asiaticum	3ADON	x
IPP14122	Hubei	Xiaogan	rice	F. asiaticum	3ADON	x
IPP14130	Hubei	Xiaogan	wheat	F. asiaticum	3ADON	x
IPP14131	Hubei	Xiaogan	wheat	F. asiaticum	15ADON	x
IPP14132	Hubei	Xiaogan	wheat	F. asiaticum	3ADON	x
IPP14133	Hubei	Xiaogan	wheat	F. asiaticum	3ADON	x
IPP14134	Hubei	Xiaogan	wheat	F. asiaticum	3ADON	x
IPP14135	Hubei	Xiaogan	wheat	F. asiaticum	3ADON	x
IPP14136	Hubei	Xiaogan	wheat	F. asiaticum	3ADON	x
IPP14137	Hubei	Xiaogan	wheat	F. asiaticum	15ADON	x
IPP14138	Hubei	Xiaogan	wheat	F. asiaticum	3ADON	x
IPP14139	Hubei	Xiaogan	wheat	F. asiaticum	3ADON	x
IPP14140	Hubei	Xiaogan	wheat	F. asiaticum	3ADON	x
IPP14141	Hubei	Xiaogan	wheat	F. asiaticum	3ADON	x
IPP14142	Hubei	Xiaogan	wheat	F. asiaticum	15ADON	x
IPP14143	Hubei	Xiaogan	wheat	F. asiaticum	3ADON	x
IPP14144	Hubei	Xiaogan	wheat	F. asiaticum	3ADON	x
IPP14145	Hubei	Xiaogan	wheat	F. asiaticum	3ADON	x
IPP14146	Hubei	Xiaogan	wheat	F. asiaticum	3ADON	x
IPP14147	Hubei	Xiaogan	wheat	F. asiaticum	3ADON	x
IPP14148	Hubei	Xiaogan	wheat	F. asiaticum	3ADON	x
IPP14149	Hubei	Xiaogan	wheat	F. asiaticum	3ADON	x
IPP14150	Hubei	Xiaogan	wheat	F. asiaticum	3ADON	x
IPP14151	Hubei	Xiaogan	wheat	F. asiaticum	3ADON	x
IPP14152	Hubei	Xiaogan	wheat	F. asiaticum	3ADON	x
IPP14153	Hubei	Xiaogan	wheat	F. asiaticum	3ADON	x
IPP14154	Hubei	Xiaogan	wheat	F. asiaticum	3ADON	x
IPP14155	Hubei	Xiaogan	wheat	F. asiaticum	3ADON	x
IPP14156	Hubei	Xiaogan	wheat	F. asiaticum	3ADON	x
IPP14157	Hubei	Xiaogan	wheat	F. asiaticum	3ADON	x
IPP14158	Hubei	Xiaogan	wheat	F. asiaticum	NIV	x
IPP14159	Hubei	Xiaogan	wheat	F. asiaticum	NIV	x
IPP14160	Hubei	Xiaogan	wheat	F. asiaticum	3ADON	x
IPP14161	Hubei	Xiaogan	wheat	F. asiaticum	3ADON	x
IPP14162	Hubei	Xiaogan	wheat	F. asiaticum	3ADON	x
IPP14163	Hubei	Xiaogan	wheat	F. asiaticum	3ADON	x
IPP14164	Hubei	Xiaogan	wheat	F. asiaticum	3ADON	x
IPP14165	Hubei	Xiaogan	wheat	F. asiaticum	3ADON	x
IPP14166	Hubei	Xiaogan	wheat	F. asiaticum	3ADON	x
IPP14167	Hubei	Xiaogan	wheat	F. asiaticum	3ADON	x
IPP14168	Hubei	Xiaogan	wheat	F. asiaticum	3ADON	x
IPP14169	Hubei	Xiaogan	wheat	F. asiaticum	3ADON	x
IPP14170	Hubei	Xiaogan	wheat	F. asiaticum	3ADON	x
IPP14171	Hubei	Xiaogan	wheat	F. asiaticum	3ADON	x
IPP14172	Hubei	Xiaogan	wheat	F. asiaticum	3ADON	x
IPP14173	Hubei	Xiaogan	wheat	F. asiaticum	3ADON	x
IPP14174	Hubei	Xiaogan	wheat	F. asiaticum	3ADON	x
IPP14175	Hubei	Xiaogan	wheat	F. asiaticum	3ADON	x
IPP14176	Hubei	Xiaogan	wheat	F. asiaticum	NIV	x
IPP14177	Hubei	Xiaogan	wheat	F. asiaticum	3ADON	x
IPP14178	Hubei	Xiaogan	wheat	F. asiaticum	3ADON	x
IPP14179	Hubei	Xiaogan	wheat	F. asiaticum	3ADON	x
IPP14180	Hubei	Xiaogan	wheat	F. asiaticum	3ADON	x
IPP14181	Hubei	Xiaogan	wheat	F. asiaticum	3ADON	x
IPP14182	Hubei	Xiaogan	wheat	F. asiaticum	3ADON	x
IPP14183	Hubei	Xiaogan	wheat	F. asiaticum	3ADON	x
IPP14184	Hubei	Xiaogan	wheat	F. asiaticum	NIV	x
IPP14185	Hubei	Xiaogan	wheat	F. asiaticum	3ADON	x
IPP14186	Hubei	Xiaogan	wheat	F. asiaticum	3ADON	x
IPP14523	Anhui	Xuanzhou	rice	F. asiaticum	3ADON	x
IPP14524	Anhui	Xuanzhou	rice	F. asiaticum	NIV	x
IPP14525	Anhui	Xuanzhou	rice	F. asiaticum	3ADON	x
IPP14526	Anhui	Xuanzhou	rice	F. asiaticum	3ADON	x
IPP14527	Anhui	Xuanzhou	rice	F. asiaticum	3ADON	x
IPP14528	Anhui	Xuanzhou	rice	F. asiaticum	3ADON	x
IPP14529	Anhui	Xuanzhou	rice	F. asiaticum	3ADON	x
IPP14530	Anhui	Xuanzhou	rice	F. asiaticum	3ADON	x
IPP14531	Anhui	Xuanzhou	rice	F. asiaticum	NIV	x
IPP14532	Anhui	Xuanzhou	rice	F. asiaticum	3ADON	x
IPP14533	Anhui	Xuanzhou	rice	F. asiaticum	NIV	x
IPP14534	Anhui	Xuanzhou	rice	F. asiaticum	3ADON	x
IPP14015	Anhui	Xuanzhou	rice	FIESC			x
IPP14536	Anhui	Xuanzhou	rice	F. asiaticum	NIV	x
IPP14537	Anhui	Xuanzhou	rice	F. asiaticum	3ADON	x
IPP14538	Anhui	Xuanzhou	rice	F. asiaticum	3ADON	x
IPP14539	Anhui	Xuanzhou	rice	F. asiaticum	NIV	x
IPP14540	Anhui	Xuanzhou	rice	F. asiaticum	NIV	x
IPP140493	Anhui	Xuanzhou	rice	FIESC			x
IPP14542	Anhui	Xuanzhou	rice	F. asiaticum	3ADON	x
IPP14543	Anhui	Xuanzhou	rice	F. armeniacum			x
IPP14544	Anhui	Xuanzhou	rice	F. asiaticum	NIV	x
IPP14545	Anhui	Xuanzhou	rice	F. asiaticum	3ADON	x
IPP14546	Anhui	Xuanzhou	rice	F. asiaticum	3ADON	x
IPP14547	Anhui	Xuanzhou	rice	F. armeniacum			x
IPP14548	Anhui	Xuanzhou	rice	F. armeniacum			x
IPP14549	Anhui	Xuanzhou	rice	F. asiaticum	NIV	x
IPP14550	Anhui	Xuanzhou	rice	F. asiaticum	3ADON	x
IPP14551	Anhui	Xuanzhou	rice	F. asiaticum	NIV	x
IPP14552	Anhui	Xuanzhou	rice	F. asiaticum	3ADON	x
IPP14553	Anhui	Xuanzhou	rice	F. asiaticum	3ADON	x
IPP14554	Anhui	Xuanzhou	rice	F. asiaticum	3ADON	x
IPP14555	Anhui	Xuanzhou	rice	F. asiaticum	3ADON	x
IPP14556	Anhui	Xuanzhou	rice	F. asiaticum	3ADON	x
IPP14557	Anhui	Xuanzhou	rice	F. asiaticum	3ADON	x
IPP14558	Anhui	Xuanzhou	rice	F. asiaticum	3ADON	x
IPP14559	Anhui	Xuanzhou	rice	F. asiaticum	3ADON	x
IPP14560	Anhui	Xuanzhou	rice	F. asiaticum	NIV	x
IPP14561	Anhui	Xuanzhou	rice	F. asiaticum	NIV	x
IPP14562	Anhui	Xuanzhou	rice	F. asiaticum	3ADON	x
IPP14563	Anhui	Xuanzhou	rice	F. armeniacum			x
IPP14564	Anhui	Xuanzhou	rice	F. armeniacum			x
IPP14565	Anhui	Xuanzhou	rice	F. asiaticum	3ADON	x
IPP14566	Anhui	Xuanzhou	rice	F. asiaticum	NIV	x
IPP14567	Anhui	Xuanzhou	rice	F. asiaticum	3ADON	x
IPP14568	Anhui	Xuanzhou	rice	F. asiaticum	3ADON	x
IPP14569	Anhui	Xuanzhou	rice	F. asiaticum	3ADON	x
IPP14570	Anhui	Xuanzhou	rice	F. armeniacum			x
IPP14571	Anhui	Xuanzhou	rice	F. asiaticum	3ADON	x
IPP14572	Anhui	Xuanzhou	rice	F. asiaticum	3ADON	x
IPP14573	Anhui	Xuanzhou	rice	F. asiaticum	NIV	x
IPP14574	Anhui	Xuanzhou	rice	F. asiaticum	NIV	x
IPP14575	Anhui	Xuanzhou	rice	F. asiaticum	3ADON	x
IPP14576	Anhui	Xuanzhou	rice	F. asiaticum	3ADON	x
IPP14577	Anhui	Xuanzhou	rice	F. asiaticum	NIV	x
IPP14578	Anhui	Xuanzhou	rice	F. asiaticum	NIV	x
IPP14579	Anhui	Xuanzhou	rice	F. asiaticum	3ADON	x
IPP14580	Anhui	Xuanzhou	rice	F. asiaticum	NIV	x
IPP14581	Anhui	Xuanzhou	rice	F. asiaticum	3ADON	x
IPP14582	Anhui	Xuanzhou	rice	F. asiaticum	3ADON	x
IPP14583	Anhui	Xuanzhou	rice	F. asiaticum	3ADON	x
IPP14584	Anhui	Xuanzhou	rice	F. asiaticum	3ADON	x
IPP14585	Anhui	Xuanzhou	rice	F. asiaticum	3ADON	x
IPP14586	Anhui	Xuanzhou	rice	F. asiaticum	NIV	x
IPP14587	Anhui	Xuanzhou	rice	F. asiaticum	3ADON	x
IPP14588	Anhui	Xuanzhou	rice	F. asiaticum	NIV	x
IPP14589	Anhui	Xuanzhou	rice	F. asiaticum	3ADON	x
IPP14590	Anhui	Xuanzhou	rice	F. asiaticum	3ADON	x
IPP14591	Anhui	Xuanzhou	rice	F. asiaticum	NIV	x
IPP14592	Anhui	Xuanzhou	rice	F. asiaticum	NIV	x
IPP14593	Anhui	Xuanzhou	rice	F. asiaticum	3ADON	x
IPP14594	Anhui	Xuanzhou	rice	F. asiaticum	3ADON	x
IPP14595	Anhui	Xuanzhou	rice	F. asiaticum	3ADON	x
IPP14596	Anhui	Xuanzhou	rice	F. asiaticum	3ADON	x
IPP14597	Anhui	Xuanzhou	rice	F. asiaticum	3ADON	x
IPP14598	Anhui	Xuanzhou	rice	F. asiaticum	NIV	x
IPP14599	Anhui	Xuanzhou	rice	F. asiaticum	3ADON	x
IPP14600	Anhui	Xuanzhou	rice	F. asiaticum	3ADON	x
IPP14601	Anhui	Xuanzhou	rice	F. asiaticum	3ADON	x
IPP14602	Anhui	Xuanzhou	rice	F. asiaticum	3ADON	x
IPP14603	Anhui	Xuanzhou	rice	F. asiaticum	3ADON	x
IPP14604	Anhui	Xuanzhou	rice	F. asiaticum	NIV	x
IPP14605	Anhui	Xuanzhou	rice	F. asiaticum	NIV	x
IPP14606	Anhui	Xuanzhou	rice	F. asiaticum	3ADON	x
IPP14607	Anhui	Xuanzhou	rice	F. graminearum	15ADON	x
IPP14608	Anhui	Xuanzhou	rice	F. asiaticum	3ADON	x
IPP14609	Anhui	Xuanzhou	rice	F. asiaticum	NIV	x
IPP14610	Anhui	Xuanzhou	rice	F. asiaticum	NIV	x
IPP14611	Anhui	Xuanzhou	rice	F. asiaticum	3ADON	x
IPP14612	Anhui	Xuanzhou	rice	F. asiaticum	3ADON	x
IPP14613	Anhui	Fengtai	rice	F. asiaticum	3ADON	x
IPP14614	Anhui	Fengtai	rice	F. asiaticum	NIV	x
IPP14615	Anhui	Fengtai	rice	F. asiaticum	3ADON	x
IPP14616	Anhui	Fengtai	rice	F. asiaticum	3ADON	x
IPP14617	Anhui	Fengtai	rice	F. asiaticum	3ADON	x
IPP14618	Anhui	Fengtai	rice	F. asiaticum	3ADON	x
IPP14619	Anhui	Fengtai	rice	F. graminearum	15ADON	x
IPP14620	Anhui	Fengtai	rice	F. asiaticum	3ADON	x
IPP14621	Anhui	Fengtai	rice	F. asiaticum	3ADON	x
IPP14622	Anhui	Fengtai	rice	F. asiaticum	NIV	x
IPP14623	Anhui	Fengtai	rice	F. asiaticum	3ADON	x
IPP14624	Anhui	Fengtai	rice	F. asiaticum	3ADON	x
IPP14625	Anhui	Fengtai	rice	F. asiaticum	3ADON	x
IPP14626	Anhui	Fengtai	rice	F. asiaticum	3ADON	x
IPP14627	Anhui	Fengtai	rice	F. asiaticum	NIV	x
IPP14628	Anhui	Fengtai	rice	F. asiaticum	NIV	x
IPP14629	Anhui	Fengtai	rice	F. asiaticum	NIV	x
IPP14630	Anhui	Fengtai	rice	F. asiaticum	3ADON	x
IPP14631	Anhui	Fengtai	rice	F. asiaticum	3ADON	x
IPP14632	Anhui	Fengtai	rice	F. asiaticum	3ADON	x
IPP14633	Anhui	Fengtai	rice	F. asiaticum	3ADON	x
IPP14634	Anhui	Fengtai	rice	F. asiaticum	3ADON	x
IPP14635	Anhui	Fengtai	rice	F. asiaticum	3ADON	x
IPP14636	Anhui	Fengtai	rice	F. asiaticum	3ADON	x
IPP14637	Anhui	Fengtai	rice	F. asiaticum	3ADON	x
IPP14638	Anhui	Fengtai	rice	F. asiaticum	3ADON	x
IPP14639	Anhui	Fengtai	rice	F. asiaticum	3ADON	x
IPP14640	Anhui	Fengtai	rice	F. asiaticum	3ADON	x
IPP14641	Anhui	Fengtai	rice	F. asiaticum	3ADON	x
IPP14642	Anhui	Xuanzhou	wheat	F. asiaticum	3ADON	x
IPP14643	Anhui	Xuanzhou	wheat	F. asiaticum	3ADON	x
IPP14644	Anhui	Xuanzhou	wheat	F. asiaticum	3ADON	x
IPP14645	Anhui	Xuanzhou	wheat	F. asiaticum	3ADON	x
IPP14646	Anhui	Xuanzhou	wheat	F. asiaticum	3ADON	x
IPP14647	Anhui	Xuanzhou	wheat	F. asiaticum	3ADON	x
IPP14648	Anhui	Xuanzhou	wheat	F. asiaticum	3ADON	x
IPP14649	Anhui	Xuanzhou	wheat	F. asiaticum	3ADON	x
IPP14650	Anhui	Xuanzhou	wheat	F. asiaticum	3ADON	x
IPP14651	Anhui	Xuanzhou	wheat	F. asiaticum	15ADON	x
IPP14652	Anhui	Xuanzhou	wheat	F. asiaticum	3ADON	x
IPP14653	Anhui	Xuanzhou	wheat	F. asiaticum	3ADON	x
IPP14654	Anhui	Xuanzhou	wheat	F. asiaticum	3ADON	x
IPP14655	Anhui	Xuanzhou	wheat	F. asiaticum	NIV	x
IPP14656	Anhui	Xuanzhou	wheat	F. asiaticum	3ADON	x
IPP14657	Anhui	Xuanzhou	wheat	F. asiaticum	3ADON	x
IPP14658	Anhui	Xuanzhou	wheat	F. asiaticum	3ADON	x
IPP14659	Anhui	Xuanzhou	wheat	F. asiaticum	3ADON	x
IPP14660	Anhui	Xuanzhou	wheat	F. asiaticum	3ADON	x
IPP14661	Anhui	Xuanzhou	wheat	F. asiaticum	NIV	x
IPP14662	Anhui	Xuanzhou	wheat	F. asiaticum	3ADON	x
IPP14663	Anhui	Xuanzhou	wheat	F. asiaticum	3ADON	x
IPP14664	Anhui	Xuanzhou	wheat	F. asiaticum	NIV	x
IPP14665	Anhui	Xuanzhou	wheat	F. asiaticum	3ADON	x
IPP14666	Anhui	Xuanzhou	wheat	F. asiaticum	3ADON	x
IPP14667	Anhui	Xuanzhou	wheat	F. asiaticum	3ADON	x
IPP14668	Anhui	Xuanzhou	wheat	F. asiaticum	3ADON	x
IPP14669	Anhui	Xuanzhou	wheat	F. asiaticum	3ADON	x
IPP14670	Anhui	Xuanzhou	wheat	F. asiaticum	3ADON	x
IPP14671	Anhui	Xuanzhou	wheat	F. asiaticum	3ADON	x
IPP14672	Anhui	Xuanzhou	wheat	F. asiaticum	3ADON	x
IPP14673	Anhui	Xuanzhou	wheat	F. asiaticum	3ADON	x
IPP14674	Anhui	Xuanzhou	wheat	F. asiaticum	3ADON	x
IPP14675	Anhui	Xuanzhou	wheat	F. asiaticum	3ADON	x
IPP14676	Anhui	Xuanzhou	wheat	F. asiaticum	3ADON	x
IPP14677	Anhui	Xuanzhou	wheat	F. asiaticum	3ADON	x
IPP14678	Anhui	Xuanzhou	wheat	F. asiaticum	3ADON	x
IPP14679	Anhui	Xuanzhou	wheat	F. asiaticum	3ADON	x
IPP14680	Anhui	Xuanzhou	wheat	F. asiaticum	3ADON	x
IPP14681	Anhui	Xuanzhou	wheat	F. verticillioides			x
IPP14682	Anhui	Xuanzhou	wheat	F. asiaticum	3ADON	x
IPP14683	Anhui	Xuanzhou	wheat	F. asiaticum	3ADON	x
IPP14684	Anhui	Xuanzhou	wheat	F. asiaticum	3ADON	x
IPP14685	Anhui	Xuanzhou	wheat	F. asiaticum	3ADON	x
IPP14686	Anhui	Xuanzhou	wheat	F. asiaticum	3ADON	x
IPP14687	Anhui	Xuanzhou	wheat	F. asiaticum	3ADON	x
IPP14688	Anhui	Xuanzhou	wheat	F. asiaticum	3ADON	x
IPP14689	Anhui	Xuanzhou	wheat	F. asiaticum	3ADON	x
IPP14690	Anhui	Xuanzhou	wheat	F. asiaticum	3ADON	x
IPP14691	Anhui	Xuanzhou	wheat	F. asiaticum	NIV	x
IPP14692	Anhui	Xuanzhou	wheat	F. asiaticum	3ADON	x
IPP14693	Anhui	Fengtai	wheat	F. asiaticum	3ADON	x
IPP14694	Anhui	Fengtai	wheat	F. asiaticum	3ADON	x
IPP14695	Anhui	Fengtai	wheat	F. asiaticum	3ADON	x
IPP14696	Anhui	Fengtai	wheat	F. asiaticum	3ADON	x
IPP14697	Anhui	Fengtai	wheat	F. asiaticum	3ADON	x
IPP14698	Anhui	Fengtai	wheat	F. graminearum	15ADON	x
IPP14699	Anhui	Fengtai	wheat	F. asiaticum	3ADON	x
IPP14700	Anhui	Fengtai	wheat	F. asiaticum	3ADON	x
IPP14701	Anhui	Fengtai	wheat	F. asiaticum	3ADON	x
IPP14702	Anhui	Fengtai	wheat	F. asiaticum	3ADON	x
IPP14703	Anhui	Fengtai	wheat	F. asiaticum	NIV	x
IPP14704	Anhui	Fengtai	wheat	F. asiaticum	3ADON	x
IPP14705	Anhui	Fengtai	wheat	F. asiaticum	3ADON	x
IPP14706	Anhui	Fengtai	wheat	F. asiaticum	3ADON	x
IPP14707	Anhui	Fengtai	wheat	F. asiaticum	3ADON	x
IPP14708	Anhui	Fengtai	wheat	F. asiaticum	NIV	x
IPP14709	Anhui	Fengtai	wheat	F. asiaticum	3ADON	x
IPP14710	Anhui	Fengtai	wheat	F. asiaticum	3ADON	x
IPP14711	Anhui	Fengtai	wheat	F. asiaticum	3ADON	x
IPP14712	Anhui	Fengtai	wheat	F. asiaticum	3ADON	x
IPP14713	Anhui	Fengtai	wheat	F. asiaticum	3ADON	x
IPP14714	Anhui	Fengtai	wheat	F. asiaticum	3ADON	x
IPP14715	Anhui	Fengtai	wheat	F. asiaticum	NIV	x
IPP14716	Anhui	Fengtai	wheat	F. asiaticum	3ADON	x
IPP14717	Anhui	Fengtai	wheat	F. asiaticum	3ADON	x
IPP14718	Anhui	Fengtai	wheat	F. asiaticum	3ADON	x
IPP14719	Anhui	Fengtai	wheat	F. asiaticum	3ADON	x
IPP14720	Anhui	Fengtai	wheat	F. asiaticum	NIV	x
IPP14721	Anhui	Fengtai	wheat	F. asiaticum	3ADON	x
IPP14722	Anhui	Fengtai	wheat	F. asiaticum	3ADON	x
IPP14723	Anhui	Fengtai	wheat	F. asiaticum	3ADON	x
IPP14724	Anhui	Fengtai	wheat	F. asiaticum	3ADON	x
IPP14725	Anhui	Fengtai	wheat	F. asiaticum	3ADON	x
IPP14726	Anhui	Fengtai	wheat	F. asiaticum	3ADON	x
IPP14727	Anhui	Fengtai	wheat	F. asiaticum	NIV	x
IPP14728	Anhui	Fengtai	wheat	F. asiaticum	3ADON	x
IPP14729	Anhui	Fengtai	wheat	F. asiaticum	3ADON	x
IPP14730	Anhui	Fengtai	wheat	F. asiaticum	3ADON	x
IPP14731	Anhui	Fengtai	wheat	F. asiaticum	3ADON	x
IPP14732	Anhui	Fengtai	wheat	F. asiaticum	NIV	x
IPP14733	Anhui	Fengtai	wheat	F. asiaticum	3ADON	x
IPP14734	Anhui	Fengtai	wheat	F. asiaticum	3ADON	x
IPP14735	Anhui	Fengtai	wheat	F. asiaticum	3ADON	x
IPP14736	Jiangsu	Yizheng	rice	F. fujikuroi			x
IPP14737	Jiangsu	Yizheng	rice	F. asiaticum	NIV	x
IPP14738	Jiangsu	Yizheng	rice	F. asiaticum	3ADON	x
IPP14739	Jiangsu	Yizheng	rice	F. proliferatum			x
IPP14740	Jiangsu	Yizheng	rice	F. asiaticum	3ADON	x
IPP14741	Jiangsu	Yizheng	rice	F. fujikuroi			x
IPP14742	Jiangsu	Yizheng	rice	F. asiaticum	NIV	x
IPP140185	Jiangsu	Yizheng	rice	FIESC			x
IPP14744	Jiangsu	Yizheng	rice	F. asiaticum	15ADON	x
IPP14745	Jiangsu	Yizheng	rice	F. asiaticum	3ADON	x
IPP14746	Jiangsu	Yizheng	rice	F. asiaticum	3ADON	x
IPP14748	Jiangsu	Yizheng	rice	F. fujikuroi			x
IPP14749	Jiangsu	Yizheng	rice	F. asiaticum	3ADON	x
IPP14750	Jiangsu	Yizheng	rice	F. proliferatum			x
IPP14751	Jiangsu	Yizheng	rice	F. asiaticum	3ADON	x
IPP14752	Jiangsu	Yizheng	rice	F. asiaticum	3ADON	x
IPP14753	Jiangsu	Yizheng	rice	F. asiaticum	3ADON	x
IPP14754	Jiangsu	Yizheng	rice	F. asiaticum	3ADON	x
IPP14755	Jiangsu	Yizheng	rice	F. fujikuroi			x
IPP14756	Jiangsu	Yizheng	rice	F. asiaticum	3ADON	x
IPP14758	Jiangsu	Yizheng	rice	F. asiaticum	3ADON	x
IPP14759	Jiangsu	Yizheng	rice	F. asiaticum	3ADON	x
IPP14760	Jiangsu	Yizheng	rice	F. asiaticum	3ADON	x
IPP14761	Jiangsu	Yizheng	rice	F. fujikuroi			x
IPP14762	Jiangsu	Yizheng	rice	F. asiaticum	NIV	x
IPP14763	Jiangsu	Yizheng	rice	F. asiaticum	15ADON	x
IPP14764	Jiangsu	Yizheng	rice	F. asiaticum	3ADON	x
IPP14765	Jiangsu	Yizheng	rice	F. asiaticum	3ADON	x
IPP14766	Jiangsu	Yizheng	rice	F. asiaticum	15ADON	x
IPP14767	Jiangsu	Yizheng	rice	F. proliferatum			x
IPP14769	Jiangsu	Yizheng	rice	F. asiaticum	NIV	x
IPP14770	Jiangsu	Yizheng	rice	F. asiaticum	3ADON	x
IPP14771	Jiangsu	Yizheng	rice	F. proliferatum			x
IPP14772	Jiangsu	Yizheng	rice	F. asiaticum	3ADON	x
IPP14774	Jiangsu	Yizheng	rice	F. asiaticum	3ADON	x
IPP14775	Jiangsu	Yizheng	rice	F. asiaticum	3ADON	x
IPP14776	Jiangsu	Yizheng	rice	F. asiaticum	NIV	x
IPP14777	Jiangsu	Yizheng	rice	F. asiaticum	3ADON	x
IPP14778	Jiangsu	Yizheng	rice	F. asiaticum	3ADON	x
IPP14779	Jiangsu	Yizheng	rice	F. asiaticum	3ADON	x
IPP14780	Jiangsu	Yizheng	rice	F. asiaticum	3ADON	x
IPP14781	Jiangsu	Yizheng	rice	F. asiaticum	3ADON	x
IPP14782	Jiangsu	Yizheng	rice	F. asiaticum	NIV	x
IPP14783	Jiangsu	Yizheng	rice	F. asiaticum	3ADON	x
IPP14784	Jiangsu	Yizheng	rice	F. asiaticum	15ADON	x
IPP14785	Jiangsu	Yizheng	rice	F. asiaticum	3ADON	x
IPP14786	Jiangsu	Yizheng	rice	F. asiaticum	3ADON	x
IPP14787	Jiangsu	Yizheng	rice	F. asiaticum	3ADON	x
IPP14788	Jiangsu	Yizheng	rice	F. asiaticum	3ADON	x
IPP14789	Jiangsu	Yizheng	rice	F. asiaticum	3ADON	x
IPP14790	Jiangsu	Yizheng	rice	F. asiaticum	NIV	x
IPP14791	Jiangsu	Yizheng	rice	F. asiaticum	3ADON	x
IPP14792	Jiangsu	Yizheng	rice	F. asiaticum	NIV	x
IPP14793	Jiangsu	Yizheng	rice	F. asiaticum	3ADON	x
IPP14794	Jiangsu	Yizheng	rice	F. asiaticum	3ADON	x
IPP14795	Jiangsu	Yizheng	rice	F. asiaticum	3ADON	x
IPP14796	Jiangsu	Yizheng	rice	F. asiaticum	3ADON	x
IPP14797	Jiangsu	Yizheng	rice	F. asiaticum	3ADON	x
IPP14798	Jiangsu	Yizheng	rice	F. asiaticum	3ADON	x
IPP14799	Jiangsu	Yizheng	rice	F. asiaticum	3ADON	x
IPP14800	Jiangsu	Yizheng	rice	F. asiaticum	3ADON	x
IPP14802	Jiangsu	Yizheng	rice	F. asiaticum	3ADON	x
IPP14803	Jiangsu	Yizheng	rice	F. asiaticum	3ADON	x
IPP14804	Jiangsu	Yizheng	rice	F. asiaticum	3ADON	x
IPP14805	Jiangsu	Yizheng	rice	F. asiaticum	3ADON	x
IPP14806	Jiangsu	Yizheng	rice	F. asiaticum	3ADON	x
IPP14807	Jiangsu	Yizheng	rice	F. asiaticum	3ADON	x
IPP14808	Jiangsu	Yizheng	rice	F. asiaticum	NIV	x
IPP14809	Jiangsu	Yizheng	rice	F. asiaticum	3ADON	x
IPP14810	Jiangsu	Yizheng	rice	F. asiaticum	3ADON	x
IPP14811	Jiangsu	Yizheng	rice	F. asiaticum	NIV	x
IPP14812	Jiangsu	Yizheng	rice	F. asiaticum	3ADON	x
IPP14813	Jiangsu	Yizheng	rice	F. asiaticum	3ADON	x
IPP14814	Jiangsu	Yizheng	rice	F. fujikuroi			x
IPP14815	Jiangsu	Yizheng	rice	F. asiaticum	3ADON	x
IPP14816	Jiangsu	Yizheng	rice	F. asiaticum	3ADON	x
IPP14817	Jiangsu	Nanjing	rice	F. asiaticum	3ADON	x
IPP14818	Jiangsu	Nanjing	rice	F. asiaticum	NIV	x
IPP14819	Jiangsu	Nanjing	rice	F. asiaticum	3ADON	x
IPP14820	Jiangsu	Nanjing	rice	F. asiaticum	3ADON	x
IPP14821	Jiangsu	Nanjing	rice	F. asiaticum	3ADON	x
IPP14822	Jiangsu	Nanjing	rice	F. asiaticum	NIV	x
IPP14823	Jiangsu	Nanjing	rice	F. asiaticum	3ADON	x
IPP14824	Jiangsu	Nanjing	rice	F. asiaticum	3ADON	x
IPP14825	Jiangsu	Nanjing	rice	F. asiaticum	NIV	x
IPP14826	Jiangsu	Nanjing	rice	F. asiaticum	3ADON	x
IPP14827	Jiangsu	Nanjing	rice	F. asiaticum	3ADON	x
IPP14828	Jiangsu	Nanjing	rice	F. asiaticum	3ADON	x
IPP14829	Jiangsu	Nanjing	rice	F. asiaticum	3ADON	x
IPP14830	Jiangsu	Nanjing	rice	F. asiaticum	3ADON	x
IPP14831	Jiangsu	Nanjing	rice	F. asiaticum	3ADON	x
IPP14832	Jiangsu	Nanjing	rice	F. asiaticum	3ADON	x
IPP14833	Jiangsu	Nanjing	rice	F. asiaticum	3ADON	x
IPP14834	Jiangsu	Nanjing	rice	F. asiaticum	3ADON	x
IPP14835	Jiangsu	Nanjing	rice	F. asiaticum	3ADON	x
IPP14836	Jiangsu	Nanjing	rice	F. asiaticum	3ADON	x
IPP14837	Jiangsu	Nanjing	rice	F. asiaticum	3ADON	x
IPP14838	Jiangsu	Nanjing	rice	F. asiaticum	3ADON	x
IPP14839	Jiangsu	Nanjing	rice	F. asiaticum	3ADON	x
IPP14840	Jiangsu	Nanjing	rice	F. asiaticum	3ADON	x
IPP14841	Jiangsu	Nanjing	rice	F. asiaticum	3ADON	x
IPP14842	Jiangsu	Nanjing	rice	F. asiaticum	NIV	x
IPP14843	Jiangsu	Nanjing	rice	F. asiaticum	3ADON	x
IPP14844	Jiangsu	Nanjing	rice	F. asiaticum	NIV	x
IPP14845	Jiangsu	Nanjing	rice	F. asiaticum	3ADON	x
IPP14846	Jiangsu	Nanjing	rice	F. asiaticum	NIV	x
IPP14847	Jiangsu	Nanjing	rice	F. asiaticum	3ADON	x
IPP14848	Jiangsu	Nanjing	rice	F. asiaticum	3ADON	x
IPP14849	Jiangsu	Nanjing	rice	F. asiaticum	3ADON	x
IPP14850	Jiangsu	Nanjing	rice	F. asiaticum	3ADON	x
IPP14851	Jiangsu	Nanjing	rice	F. asiaticum	NIV	x
IPP14852	Jiangsu	Nanjing	rice	F. asiaticum	3ADON	x
IPP14853	Jiangsu	Nanjing	rice	F. asiaticum	3ADON	x
IPP14854	Jiangsu	Nanjing	rice	F. asiaticum	3ADON	x
IPP14855	Jiangsu	Nanjing	rice	F. asiaticum	NIV	x
IPP14856	Jiangsu	Nanjing	rice	F. asiaticum	NIV	x
IPP14857	Jiangsu	Nanjing	rice	F. asiaticum	NIV	x
IPP14858	Jiangsu	Nanjing	rice	F. asiaticum	3ADON	x
IPP14859	Jiangsu	Nanjing	rice	F. asiaticum	3ADON	x
IPP14860	Jiangsu	Nanjing	rice	F. asiaticum	3ADON	x
IPP14861	Jiangsu	Nanjing	rice	F. asiaticum	3ADON	x
IPP14862	Jiangsu	Nanjing	rice	F. asiaticum	NIV	x
IPP14863	Jiangsu	Nanjing	rice	F. asiaticum	NIV	x
IPP14864	Jiangsu	Nanjing	rice	F. asiaticum	NIV	x
IPP14865	Jiangsu	Nanjing	rice	F. asiaticum	3ADON	x
IPP14866	Jiangsu	Nanjing	rice	F. asiaticum	NIV	x
IPP14867	Jiangsu	Nanjing	rice	F. asiaticum	3ADON	x
IPP14868	Jiangsu	Nanjing	rice	F. asiaticum	NIV	x
IPP14869	Jiangsu	Nanjing	rice	F. asiaticum	3ADON	x
IPP14870	Jiangsu	Nanjing	rice	F. asiaticum	3ADON	x
IPP14871	Jiangsu	Nanjing	rice	F. asiaticum	3ADON	x
IPP14872	Jiangsu	Nanjing	rice	F. asiaticum	3ADON	x
IPP14873	Jiangsu	Nanjing	rice	F. asiaticum	3ADON	x
IPP14874	Jiangsu	Nanjing	rice	F. nygamai			x
IPP14875	Jiangsu	Nanjing	rice	F. asiaticum	NIV	x
IPP14876	Jiangsu	Nanjing	rice	F. asiaticum	3ADON	x
IPP14877	Jiangsu	Nanjing	rice	F. asiaticum	NIV	x
IPP14878	Jiangsu	Nanjing	rice	F. asiaticum	3ADON	x
IPP14879	Jiangsu	Nanjing	rice	F. asiaticum	3ADON	x
IPP14880	Jiangsu	Nanjing	rice	F. asiaticum	3ADON	x
IPP14881	Jiangsu	Nanjing	rice	F. asiaticum	3ADON	x
IPP14882	Jiangsu	Nanjing	rice	F. asiaticum	3ADON	x
IPP14883	Jiangsu	Nanjing	rice	F. asiaticum	NIV	x
IPP14884	Jiangsu	Nanjing	rice	F. asiaticum	3ADON	x
IPP14885	Jiangsu	Nanjing	rice	F. nygamai			x
IPP14886	Jiangsu	Nanjing	rice	F. asiaticum	3ADON	x
IPP14887	Jiangsu	Nanjing	rice	F. asiaticum	3ADON	x
IPP14888	Jiangsu	Nanjing	rice	F. asiaticum	3ADON	x
IPP14889	Jiangsu	Nanjing	rice	F. asiaticum	3ADON	x
IPP14890	Jiangsu	Nanjing	rice	F. asiaticum	3ADON	x
IPP14891	Jiangsu	Nanjing	rice	F. asiaticum	3ADON	x
IPP14892	Jiangsu	Nanjing	rice	F. asiaticum	3ADON	x
IPP14893	Jiangsu	Nanjing	rice	F. graminearum	15ADON	x
IPP14894	Jiangsu	Nanjing	rice	F. asiaticum	3ADON	x
IPP14895	Jiangsu	Yizheng	wheat	F. asiaticum	3ADON	x
IPP14896	Jiangsu	Yizheng	wheat	F. asiaticum	3ADON	x
IPP14897	Jiangsu	Yizheng	wheat	F. asiaticum	3ADON	x
IPP14898	Jiangsu	Yizheng	wheat	F. asiaticum	3ADON	x
IPP14899	Jiangsu	Yizheng	wheat	F. asiaticum	3ADON	x
IPP14900	Jiangsu	Yizheng	wheat	F. graminearum	15ADON	x
IPP14901	Jiangsu	Yizheng	wheat	F. asiaticum	3ADON	x
IPP14902	Jiangsu	Yizheng	wheat	F. asiaticum	3ADON	x
IPP14903	Jiangsu	Yizheng	wheat	F. asiaticum	3ADON	x
IPP14904	Jiangsu	Yizheng	wheat	F. asiaticum	3ADON	x
IPP14905	Jiangsu	Yizheng	wheat	F. asiaticum	3ADON	x
IPP14906	Jiangsu	Yizheng	wheat	F. asiaticum	3ADON	x
IPP14907	Jiangsu	Yizheng	wheat	F. asiaticum	3ADON	x
IPP14908	Jiangsu	Yizheng	wheat	F. asiaticum	3ADON	x
IPP14909	Jiangsu	Yizheng	wheat	F. graminearum	15ADON	x
IPP14910	Jiangsu	Yizheng	wheat	F. asiaticum	3ADON	x
IPP14911	Jiangsu	Yizheng	wheat	F. asiaticum	3ADON	x
IPP14912	Jiangsu	Yizheng	wheat	F. asiaticum	3ADON	x
IPP14913	Jiangsu	Yizheng	wheat	F. asiaticum	3ADON	x
IPP14914	Jiangsu	Yizheng	wheat	F. asiaticum	3ADON	x
IPP14915	Jiangsu	Yizheng	wheat	F. asiaticum	3ADON	x
IPP14916	Jiangsu	Yizheng	wheat	F. asiaticum	3ADON	x
IPP14917	Jiangsu	Yizheng	wheat	F. asiaticum	3ADON	x
IPP14918	Jiangsu	Yizheng	wheat	F. asiaticum	NIV	x
IPP14919	Jiangsu	Yizheng	wheat	F. asiaticum	3ADON	x
IPP14920	Jiangsu	Yizheng	wheat	F. asiaticum	3ADON	x
IPP14921	Jiangsu	Yizheng	wheat	F. asiaticum	3ADON	x
IPP14922	Jiangsu	Yizheng	wheat	F. asiaticum	3ADON	x
IPP14923	Jiangsu	Yizheng	wheat	F. asiaticum	3ADON	x
IPP14924	Jiangsu	Yizheng	wheat	F. asiaticum	3ADON	x
IPP14925	Jiangsu	Yizheng	wheat	F. asiaticum	3ADON	x
IPP14926	Jiangsu	Yizheng	wheat	F. asiaticum	NIV	x
IPP14927	Jiangsu	Yizheng	wheat	F. asiaticum	3ADON	x
IPP14928	Jiangsu	Yizheng	wheat	F. asiaticum	3ADON	x
IPP14929	Jiangsu	Yizheng	wheat	F. asiaticum	3ADON	x
IPP14930	Jiangsu	Yizheng	wheat	F. asiaticum	3ADON	x
IPP14931	Jiangsu	Yizheng	wheat	F. asiaticum	3ADON	x
IPP14932	Jiangsu	Yizheng	wheat	F. asiaticum	3ADON	x
IPP14933	Jiangsu	Yizheng	wheat	F. asiaticum	3ADON	x
IPP14934	Jiangsu	Nanjing	wheat	F. asiaticum	3ADON	x
IPP14935	Jiangsu	Nanjing	wheat	F. asiaticum	3ADON	x
IPP14936	Jiangsu	Nanjing	wheat	F. asiaticum	3ADON	x
IPP14937	Jiangsu	Nanjing	wheat	F. asiaticum	3ADON	x
IPP14938	Jiangsu	Nanjing	wheat	F. asiaticum	3ADON	x
IPP14939	Jiangsu	Nanjing	wheat	F. asiaticum	3ADON	x
IPP14940	Jiangsu	Nanjing	wheat	F. asiaticum	3ADON	x
IPP14941	Jiangsu	Nanjing	wheat	F. asiaticum	3ADON	x
IPP14942	Jiangsu	Nanjing	wheat	F. asiaticum	3ADON	x
IPP14943	Jiangsu	Nanjing	wheat	F. asiaticum	NIV	x
IPP14944	Jiangsu	Nanjing	wheat	F. asiaticum	3ADON	x
IPP14945	Jiangsu	Nanjing	wheat	F. asiaticum	3ADON	x
IPP14946	Jiangsu	Nanjing	wheat	F. asiaticum	3ADON	x
IPP14947	Jiangsu	Nanjing	wheat	F. asiaticum	3ADON	x
IPP14948	Jiangsu	Nanjing	wheat	F. asiaticum	3ADON	x
IPP14949	Jiangsu	Nanjing	wheat	F. asiaticum	3ADON	x
IPP14950	Jiangsu	Nanjing	wheat	F. asiaticum	3ADON	x
IPP14951	Jiangsu	Nanjing	wheat	F. asiaticum	3ADON	x
IPP14952	Jiangsu	Nanjing	wheat	F. asiaticum	NIV	x
IPP14953	Jiangsu	Nanjing	wheat	F. asiaticum	3ADON	x
IPP14954	Jiangsu	Nanjing	wheat	F. asiaticum	3ADON	x
IPP14955	Jiangsu	Nanjing	wheat	F. fujikuroi			x
IPP14956	Jiangsu	Nanjing	wheat	F. asiaticum	3ADON	x
IPP14957	Jiangsu	Nanjing	wheat	F. asiaticum	3ADON	x
IPP14958	Jiangsu	Nanjing	wheat	F. asiaticum	3ADON	x
IPP14959	Jiangsu	Nanjing	wheat	F. asiaticum	3ADON	x
IPP14960	Jiangsu	Nanjing	wheat	F. asiaticum	NIV	x
IPP14961	Jiangsu	Nanjing	wheat	F. asiaticum	3ADON	x
IPP14962	Jiangsu	Nanjing	wheat	F. asiaticum	3ADON	x
IPP14963	Fujian	Nanping	rice	F. asiaticum	NIV	x
IPP14964	Fujian	Nanping	rice	F. asiaticum	NIV	x
IPP14965	Fujian	Nanping	rice	F. asiaticum	15ADON	x
IPP14966	Fujian	Nanping	rice	F. asiaticum	NIV	x
IPP14967	Fujian	Nanping	rice	F. asiaticum	NIV	x
IPP14968	Fujian	Nanping	rice	F. asiaticum	15ADON	x
IPP14969	Fujian	Nanping	rice	F. asiaticum	NIV	x
IPP14970	Fujian	Nanping	rice	F. asiaticum	NIV	x
IPP14971	Fujian	Nanping	rice	F. asiaticum	NIV	x
IPP14972	Fujian	Nanping	rice	F. asiaticum	NIV	x
IPP14973	Fujian	Nanping	rice	F. asiaticum	NIV	x
IPP14974	Fujian	Nanping	rice	F. asiaticum	NIV	x
IPP14975	Fujian	Nanping	rice	F. asiaticum	NIV	x
IPP14976	Fujian	Nanping	rice	F. asiaticum	NIV	x
IPP14977	Fujian	Nanping	rice	F. asiaticum	NIV	x
IPP14978	Fujian	Nanping	rice	F. asiaticum	NIV	x
IPP14979	Fujian	Nanping	rice	F. asiaticum	15ADON	x
IPP14980	Fujian	Nanping	rice	F. asiaticum	NIV	x
IPP14981	Fujian	Nanping	rice	F. asiaticum	NIV	x
IPP140264	Fujian	Nanping	rice	FIESC			x
IPP_140136	Fujian	Nanping	rice	F. asiaticum	15ADON	x
IPP140136	Fujian	Nanping	rice	FIESC			x
IPP_140136	Fujian	Nanping	rice	F. asiaticum	15ADON	x
IPP14986	Fujian	Nanping	rice	F. asiaticum	NIV	x
IPP14987	Fujian	Nanping	rice	F. asiaticum	NIV	x
IPP14988	Fujian	Nanping	rice	F. asiaticum	15ADON	x
IPP14989	Fujian	Nanping	rice	F. asiaticum	15ADON	x
IPP14990	Fujian	Nanping	rice	F. asiaticum	15ADON	x
IPP14991	Fujian	Nanping	rice	F. asiaticum	NIV	x
IPP14992	Fujian	Nanping	rice	F. asiaticum	NIV	x
IPP14993	Fujian	Nanping	rice	F. asiaticum	NIV	x
IPP14994	Fujian	Nanping	rice	F. asiaticum	15ADON	x
IPP14995	Fujian	Nanping	rice	F. asiaticum	15ADON	x
IPP14996	Fujian	Nanping	rice	F. asiaticum	15ADON	x
IPP14997	Fujian	Nanping	rice	F. asiaticum	15ADON	x
IPP14998	Fujian	Nanping	rice	F. asiaticum	NIV	x
IPP14999	Fujian	Nanping	rice	F. asiaticum	NIV	x
IPP140000	Fujian	Nanping	rice	F. asiaticum	15ADON	x
IPP140001	Fujian	Nanping	rice	F. asiaticum	15ADON	x
IPP140002	Fujian	Nanping	rice	F. asiaticum	15ADON	x
IPP140003	Fujian	Nanping	rice	F. asiaticum	15ADON	x
IPP140004	Fujian	Nanping	rice	F. asiaticum	15ADON	x
IPP140005	Fujian	Nanping	rice	F. asiaticum	15ADON	x
IPP140006	Fujian	Nanping	rice	F. asiaticum	15ADON	x
IPP140007	Fujian	Nanping	rice	F. asiaticum	NIV	x
IPP140008	Fujian	Nanping	rice	F. asiaticum	15ADON	x
IPP140009	Fujian	Nanping	rice	F. asiaticum	15ADON	x
IPP140010	Fujian	Nanping	rice	F. asiaticum	NIV	x
IPP140011	Fujian	Nanping	rice	F. asiaticum	15ADON	x
IPP140012	Fujian	Nanping	rice	F. asiaticum	NIV	x
IPP140013	Fujian	Nanping	rice	F. asiaticum	15ADON	x
IPP140014	Fujian	Nanping	rice	F. asiaticum	NIV	x
IPP140015	Fujian	Nanping	rice	F. asiaticum	NIV	x
IPP140016	Fujian	Nanping	rice	F. asiaticum	NIV	x
IPP140017	Fujian	Nanping	rice	F. asiaticum	NIV	x
IPP140018	Fujian	Nanping	rice	F. asiaticum	NIV	x
IPP140019	Fujian	Nanping	rice	F. asiaticum	NIV	x
IPP140020	Fujian	Nanping	rice	F. asiaticum	NIV	x
IPP140021	Fujian	Nanping	rice	F. asiaticum	NIV	x
IPP140022	Fujian	Nanping	rice	F. asiaticum	15ADON	x
IPP140023	Fujian	Nanping	rice	F. asiaticum	NIV	x
IPP140024	Fujian	Nanping	rice	F. asiaticum	15ADON	x
IPP140025	Fujian	Nanping	rice	F. asiaticum	NIV	x
IPP140026	Fujian	Nanping	rice	F. asiaticum	15ADON	x
IPP140027	Fujian	Nanping	rice	F. asiaticum	15ADON	x
IPP140028	Fujian	Nanping	rice	F. asiaticum	15ADON	x
IPP140029	Fujian	Nanping	rice	F. asiaticum	NIV	x
IPP140030	Fujian	Nanping	rice	F. asiaticum	15ADON	x
IPP140031	Fujian	Nanping	rice	F. asiaticum	NIV	x
IPP140032	Fujian	Nanping	rice	F. asiaticum	NIV	x
IPP140033	Fujian	Nanping	rice	F. asiaticum	NIV	x
IPP140034	Fujian	Nanping	rice	F. asiaticum	NIV	x
IPP140035	Fujian	Nanping	rice	F. asiaticum	15ADON	x
IPP140036	Fujian	Nanping	rice	F. asiaticum	15ADON	x
IPP140037	Fujian	Nanping	rice	F. asiaticum	15ADON	x
IPP140038	Fujian	Nanping	rice	F. asiaticum	NIV	x
IPP140039	Fujian	Nanping	rice	F. asiaticum	NIV	x
IPP140040	Fujian	Nanping	rice	F. asiaticum	15ADON	x
IPP140041	Fujian	Nanping	rice	F. asiaticum	NIV	x
IPP140042	Fujian	Nanping	rice	F. asiaticum	NIV	x
IPP140043	Fujian	Nanping	rice	F. asiaticum	NIV	x
IPP140044	Fujian	Nanping	rice	F. asiaticum	NIV	x
IPP140045	Fujian	Nanping	rice	F. asiaticum	NIV	x
IPP140046	Fujian	Nanping	rice	F. asiaticum	15ADON	x
IPP140047	Fujian	Nanping	rice	F. asiaticum	NIV	x
IPP140048	Fujian	Nanping	rice	F. asiaticum	NIV	x
IPP140049	Fujian	Nanping	rice	F. asiaticum	NIV	x
IPP140050	Fujian	Nanping	rice	F. asiaticum	NIV	x
IPP140051	Fujian	Nanping	rice	F. asiaticum	15ADON	x
IPP140052	Fujian	Nanping	rice	F. asiaticum	15ADON	x
IPP140053	Fujian	Nanping	rice	F. asiaticum	NIV	x
IPP140054	Fujian	Nanping	rice	F. asiaticum	15ADON	x
IPP140055	Fujian	Nanping	rice	F. asiaticum	NIV	x
IPP140056	Fujian	Nanping	rice	F. asiaticum	15ADON	x
IPP140057	Fujian	Nanping	rice	F. asiaticum	15ADON	x
IPP140058	Fujian	Nanping	rice	F. asiaticum	15ADON	x
IPP140059	Fujian	Nanping	rice	F. asiaticum	NIV	x
IPP140060	Fujian	Nanping	rice	F. asiaticum	15ADON	x
IPP140061	Fujian	Nanping	rice	F. asiaticum	15ADON	x
IPP140062	Fujian	Nanping	rice	F. asiaticum	NIV	x
IPP140063	Fujian	Nanping	rice	F. asiaticum	15ADON	x
IPP140064	Fujian	Nanping	rice	F. asiaticum	15ADON	x
IPP140065	Fujian	Nanping	rice	F. asiaticum	NIV	x
IPP140066	Fujian	Nanping	rice	F. asiaticum	15ADON	x
IPP140067	Fujian	Nanping	rice	F. asiaticum	15ADON	x
IPP140068	Fujian	Nanping	rice	F. asiaticum	NIV	x
IPP140069	Fujian	Nanping	rice	F. asiaticum	15ADON	x
IPP140070	Fujian	Nanping	rice	F. asiaticum	NIV	x
IPP140071	Fujian	Nanping	rice	F. asiaticum	15ADON	x
IPP140072	Fujian	Nanping	rice	F. asiaticum	15ADON	x
IPP140073	Fujian	Nanping	rice	F. asiaticum	NIV	x
IPP140074	Fujian	Nanping	rice	F. asiaticum	15ADON	x
IPP140075	Fujian	Nanping	rice	F. asiaticum	15ADON	x
IPP140076	Fujian	Nanping	rice	F. asiaticum	NIV	x
IPP140077	Fujian	Nanping	rice	F. asiaticum	15ADON	x
IPP140078	Fujian	Nanping	rice	F. asiaticum	15ADON	x
IPP140079	Fujian	Nanping	wheat	F. asiaticum	NIV	x
IPP140080	Fujian	Nanping	wheat	F. asiaticum	15ADON	x
IPP140081	Fujian	Nanping	wheat	F. asiaticum	15ADON	x
IPP140082	Fujian	Nanping	wheat	F. asiaticum	NIV	x
IPP140174	Fujian	Nanping	wheat	FIESC			x
IPP140084	Fujian	Nanping	wheat	F. asiaticum	3ADON	x
IPP140085	Fujian	Nanping	wheat	F. asiaticum	NIV	x
IPP140086	Fujian	Nanping	wheat	F. asiaticum	NIV	x
IPP140087	Fujian	Nanping	wheat	F. kyushuense			x
IPP140088	Fujian	Nanping	wheat	F. asiaticum	15ADON	x
IPP140089	Fujian	Nanping	wheat	F. asiaticum	NIV	x
IPP140090	Fujian	Nanping	wheat	F. graminearum	15ADON	x
IPP140091	Fujian	Nanping	wheat	F. asiaticum	3ADON	x
IPP140092	Fujian	Nanping	wheat	F. asiaticum	NIV	x
IPP140093	Fujian	Nanping	wheat	F. asiaticum	15ADON	x
IPP140094	Fujian	Nanping	wheat	F. asiaticum	15ADON	x
IPP140095	Fujian	Nanping	wheat	F. asiaticum	NIV	x
IPP140096	Fujian	Nanping	wheat	F. asiaticum	NIV	x
IPP140097	Fujian	Nanping	wheat	F. asiaticum	NIV	x
IPP140098	Fujian	Nanping	wheat	F. asiaticum	NIV	x
IPP140099	Fujian	Nanping	wheat	F. graminearum	15ADON	x
IPP140100	Fujian	Nanping	wheat	F. asiaticum	NIV	x
IPP140101	Fujian	Nanping	wheat	F. asiaticum	NIV	x
IPP140102	Fujian	Nanping	wheat	F. asiaticum	3ADON	x
IPP140103	Fujian	Nanping	wheat	F. asiaticum	15ADON	x
IPP140104	Fujian	Nanping	wheat	F. asiaticum	NIV	x
IPP1427033	Fujian	Nanping	wheat	FIESC			x
IPP_1401222	Fujian	Nanping	wheat	F. asiaticum	NIV	x
IPP140107	Fujian	Nanping	wheat	F. asiaticum	NIV	x
IPP140108	Fujian	Nanping	wheat	F. asiaticum	3ADON	x
IPP140109	Fujian	Nanping	wheat	F. asiaticum	NIV	x
IPP140110	Fujian	Nanping	wheat	F. asiaticum	NIV	x
IPP140111	Fujian	Nanping	wheat	F. asiaticum	NIV	x
IPP140112	Fujian	Nanping	wheat	F. asiaticum	NIV	x
IPP140113	Fujian	Nanping	wheat	F. asiaticum	NIV	x
IPP140114	Fujian	Nanping	wheat	F. asiaticum	NIV	x
IPP140115	Fujian	Nanping	wheat	F. asiaticum	NIV	x
IPP140116	Fujian	Nanping	wheat	F. asiaticum	15ADON	x
IPP140117	Fujian	Nanping	wheat	F. asiaticum	NIV	x
IPP140118	Fujian	Nanping	wheat	F. asiaticum	NIV	x
IPP140119	Fujian	Nanping	wheat	F. asiaticum	NIV	x
IPP140120	Fujian	Nanping	wheat	F. asiaticum	15ADON	x
IPP140121	Fujian	Nanping	wheat	F. asiaticum	NIV	x
IPP140122	Fujian	Nanping	wheat	F. asiaticum	3ADON	x
IPP140123	Fujian	Nanping	wheat	F. asiaticum	NIV	x
IPP140124	Fujian	Nanping	wheat	F. asiaticum	NIV	x
IPP140125	Fujian	Nanping	wheat	F. asiaticum	NIV	x
IPP140126	Fujian	Nanping	wheat	F. asiaticum	NIV	x
IPP140127	Fujian	Nanping	wheat	F. asiaticum	NIV	x
IPP140128	Fujian	Nanping	wheat	F. asiaticum	15ADON	x
IPP140129	Fujian	Nanping	wheat	F. asiaticum	NIV	x
IPP140130	Fujian	Nanping	wheat	F. asiaticum	3ADON	x
IPP140131	Fujian	Nanping	wheat	F. asiaticum	15ADON	x
IPP140132	Fujian	Nanping	wheat	F. asiaticum	NIV	x
IPP140133	Fujian	Nanping	wheat	F. asiaticum	NIV	x
IPP140134	Fujian	Nanping	wheat	F. asiaticum	NIV	x
IPP140135	Fujian	Nanping	wheat	F. asiaticum	15ADON	x
IPP140136	Fujian	Nanping	wheat	F. asiaticum	NIV	x
IPP140137	Fujian	Nanping	wheat	F. asiaticum	NIV	x
IPP140138	Fujian	Nanping	wheat	F. asiaticum	3ADON	x
IPP140139	Fujian	Nanping	wheat	F. asiaticum	3ADON	x
IPP140140	Fujian	Nanping	wheat	F. asiaticum	15ADON	x
IPP140141	Fujian	Nanping	wheat	F. asiaticum	NIV	x
IPP140142	Fujian	Nanping	wheat	F. asiaticum	15ADON	x
IPP140143	Fujian	Nanping	wheat	F. asiaticum	15ADON	x
IPP140144	Fujian	Nanping	wheat	F. asiaticum	NIV	x
IPP140145	Fujian	Nanping	wheat	F. asiaticum	NIV	x
IPP140146	Fujian	Nanping	wheat	F. asiaticum	NIV	x
IPP140147	Fujian	Nanping	wheat	F. asiaticum	3ADON	x
IPP140148	Fujian	Nanping	wheat	F. asiaticum	15ADON	x
IPP140149	Fujian	Nanping	wheat	F. asiaticum	NIV	x
IPP140150	Fujian	Nanping	wheat	F. asiaticum	NIV	x
IPP140151	Fujian	Nanping	wheat	F. asiaticum	15ADON	x
IPP140152	Fujian	Nanping	wheat	F. asiaticum	NIV	x
IPP140153	Fujian	Nanping	wheat	F. asiaticum	15ADON	x
IPP140154	Fujian	Nanping	wheat	F. asiaticum	3ADON	x
IPP140155	Fujian	Nanping	wheat	F. asiaticum	3ADON	x
IPP140156	Fujian	Nanping	wheat	F. asiaticum	15ADON	x
IPP140157	Fujian	Nanping	wheat	F. asiaticum	NIV	x
IPP140158	Fujian	Nanping	wheat	F. asiaticum	15ADON	x
IPP140159	Fujian	Nanping	wheat	F. asiaticum	15ADON	x
IPP140160	Fujian	Nanping	wheat	F. asiaticum	15ADON	x
IPP140161	Fujian	Nanping	wheat	F. asiaticum	3ADON	x
IPP140162	Fujian	Nanping	wheat	F. asiaticum	3ADON	x
IPP140163	Fujian	Nanping	wheat	F. asiaticum	NIV	x
IPP140164	Fujian	Nanping	wheat	F. asiaticum	NIV	x
IPP140165	Fujian	Nanping	wheat	F. asiaticum	NIV	x
IPP140166	Fujian	Nanping	wheat	F. asiaticum	3ADON	x
IPP140167	Fujian	Nanping	wheat	F. asiaticum	NIV	x
IPP140168	Fujian	Nanping	wheat	F. asiaticum	15ADON	x
IPP140169	Fujian	Nanping	wheat	F. asiaticum	NIV	x
IPP140170	Fujian	Nanping	wheat	F. asiaticum	NIV	x
IPP140171	Fujian	Nanping	wheat	F. asiaticum	15ADON	x
IPP140172	Fujian	Nanping	wheat	F. asiaticum	15ADON	x
IPP140173	Fujian	Nanping	wheat	F. asiaticum	NIV	x
IPP140174	Fujian	Nanping	wheat	F. asiaticum	NIV	x
IPP140175	Fujian	Nanping	wheat	F. asiaticum	NIV	x
IPP140176	Fujian	Nanping	wheat	F. asiaticum	NIV	x
IPP1401222	Fujian	Nanping	wheat	FIESC			x
IPP_1401222	Fujian	Nanping	wheat	F. asiaticum	NIV	x
IPP140179	Fujian	Nanping	wheat	F. asiaticum	NIV	x
IPP140180	Fujian	Nanping	wheat	F. asiaticum	NIV	x
IPP140181	Fujian	Nanping	wheat	F. asiaticum	NIV	x
IPP140182	Fujian	Nanping	wheat	F. asiaticum	15ADON	x
IPP140183	Fujian	Nanping	wheat	F. asiaticum	15ADON	x
IPP140184	Fujian	Nanping	wheat	F. asiaticum	NIV	x
IPP140185	Fujian	Nanping	wheat	F. asiaticum	3ADON	x
IPP140186	Fujian	Nanping	wheat	F. asiaticum	NIV	x
IPP140187	Fujian	Nanping	wheat	F. asiaticum	NIV	x
IPP140188	Fujian	Nanping	wheat	F. asiaticum	15ADON	x
IPP140189	Fujian	Nanping	wheat	F. asiaticum	NIV	x
IPP140190	Fujian	Nanping	wheat	F. asiaticum	NIV	x
IPP140191	Fujian	Nanping	wheat	F. asiaticum	NIV	x
IPP140192	Fujian	Nanping	wheat	F. asiaticum	3ADON	x
IPP140193	Fujian	Nanping	wheat	F. asiaticum	15ADON	x
IPP140194	Fujian	Nanping	wheat	F. asiaticum	NIV	x
IPP140195	Fujian	Nanping	wheat	F. asiaticum	15ADON	x
IPP140196	Fujian	Nanping	wheat	F. asiaticum	NIV	x
IPP140197	Fujian	Nanping	wheat	F. asiaticum	NIV	x
IPP140198	Fujian	Nanping	wheat	F. graminearum	15ADON	x
IPP140199	Fujian	Nanping	wheat	F. asiaticum	NIV	x
IPP140200	Fujian	Nanping	wheat	F. asiaticum	NIV	x
IPP140201	Fujian	Nanping	wheat	F. asiaticum	3ADON	x
IPP140202	Fujian	Nanping	wheat	F. asiaticum	NIV	x
IPP140203	Fujian	Nanping	wheat	F. asiaticum	NIV	x
IPP140204	Fujian	Nanping	wheat	F. asiaticum	15ADON	x
IPP140205	Fujian	Nanping	wheat	F. asiaticum	NIV	x
IPP140206	Fujian	Nanping	wheat	F. asiaticum	15ADON	x
IPP140207	Fujian	Nanping	wheat	F. asiaticum	NIV	x
IPP140208	Fujian	Nanping	wheat	F. asiaticum	15ADON	x
IPP140209	Fujian	Nanping	wheat	F. asiaticum	NIV	x
IPP140210	Fujian	Nanping	wheat	F. asiaticum	15ADON	x
IPP140211	Fujian	Nanping	wheat	F. asiaticum	3ADON	x
IPP140212	Fujian	Nanping	wheat	F. asiaticum	NIV	x
IPP140213	Fujian	Nanping	wheat	F. asiaticum	NIV	x
IPP140214	Fujian	Nanping	wheat	F. asiaticum	NIV	x
IPP140215	Fujian	Nanping	wheat	F. asiaticum	NIV	x
IPP140216	Fujian	Nanping	wheat	F. asiaticum	NIV	x
IPP140217	Fujian	Nanping	wheat	F. asiaticum	NIV	x
IPP140218	Fujian	Nanping	wheat	F. asiaticum	NIV	x
IPP140219	Fujian	Nanping	wheat	F. asiaticum	NIV	x
IPP140220	Fujian	Nanping	wheat	F. asiaticum	NIV	x
IPP140221	Fujian	Nanping	wheat	F. asiaticum	NIV	x
IPP140222	Fujian	Nanping	wheat	F. asiaticum	NIV	x
IPP140223	Fujian	Nanping	wheat	F. asiaticum	3ADON	x
IPP140224	Fujian	Nanping	wheat	F. asiaticum	15ADON	x
IPP140225	Fujian	Nanping	wheat	F. asiaticum	NIV	x
IPP140226	Fujian	Nanping	wheat	F. asiaticum	NIV	x
IPP140227	Fujian	Nanping	wheat	F. asiaticum	NIV	x
IPP140228	Fujian	Nanping	wheat	F. asiaticum	NIV	x
IPP140229	Fujian	Nanping	wheat	F. asiaticum	NIV	x
IPP140230	Fujian	Nanping	wheat	F. asiaticum	NIV	x
IPP140231	Fujian	Nanping	wheat	F. asiaticum	3ADON	x
IPP140232	Fujian	Nanping	wheat	F. asiaticum	3ADON	x
IPP140233	Fujian	Nanping	wheat	F. asiaticum	NIV	x
IPP140234	Fujian	Nanping	wheat	F. asiaticum	NIV	x
IPP140235	Fujian	Nanping	wheat	F. asiaticum	3ADON	x
IPP140236	Fujian	Nanping	wheat	F. asiaticum	15ADON	x
IPP140237	Fujian	Nanping	wheat	F. asiaticum	15ADON	x
IPP140238	Fujian	Nanping	wheat	F. asiaticum	NIV	x
IPP140239	Fujian	Nanping	wheat	F. asiaticum	NIV	x
IPP140240	Fujian	Nanping	wheat	F. asiaticum	NIV	x
IPP140241	Fujian	Nanping	wheat	F. asiaticum	NIV	x
IPP140242	Fujian	Nanping	wheat	F. asiaticum	NIV	x
IPP140243	Fujian	Nanping	wheat	F. asiaticum	NIV	x
IPP140244	Fujian	Nanping	wheat	F. asiaticum	NIV	x
IPP140245	Fujian	Nanping	wheat	F. asiaticum	NIV	x
IPP140246	Fujian	Nanping	wheat	F. asiaticum	15ADON	x
IPP140247	Fujian	Nanping	wheat	F. asiaticum	NIV	x
IPP140248	Fujian	Nanping	wheat	F. asiaticum	15ADON	x
IPP140249	Fujian	Nanping	wheat	F. asiaticum	NIV	x
IPP140250	Fujian	Nanping	wheat	F. asiaticum	NIV	x
IPP140251	Fujian	Nanping	wheat	F. asiaticum	NIV	x
IPP140252	Fujian	Nanping	wheat	F. asiaticum	NIV	x
IPP140253	Fujian	Nanping	wheat	F. asiaticum	NIV	x
IPP140254	Fujian	Nanping	wheat	F. asiaticum	NIV	x
IPP140255	Fujian	Nanping	wheat	F. asiaticum	NIV	x
IPP140256	Fujian	Nanping	wheat	F. asiaticum	NIV	x
IPP140257	Fujian	Nanping	wheat	F. asiaticum	NIV	x
IPP140258	Fujian	Nanping	wheat	F. asiaticum	NIV	x
IPP140259	Fujian	Nanping	wheat	F. asiaticum	NIV	x
IPP140260	Fujian	Nanping	wheat	F. asiaticum	NIV	x
IPP140261	Fujian	Nanping	wheat	F. asiaticum	NIV	x
IPP140262	Fujian	Nanping	wheat	F. asiaticum	NIV	x
IPP140263	Fujian	Nanping	wheat	F. asiaticum	NIV	x
IPP140264	Fujian	Nanping	wheat	F. asiaticum	NIV	x
IPP140265	Fujian	Nanping	wheat	F. asiaticum	NIV	x
IPP140266	Fujian	Nanping	wheat	F. asiaticum	NIV	x
IPP140267	Fujian	Nanping	wheat	F. asiaticum	NIV	x
IPP140268	Fujian	Nanping	wheat	F. asiaticum	NIV	x
IPP140269	Fujian	Nanping	wheat	F. asiaticum	NIV	x
IPP140270	Fujian	Nanping	wheat	F. asiaticum	NIV	x
IPP140271	Fujian	Nanping	wheat	F. asiaticum	NIV	x
IPP140272	Fujian	Nanping	wheat	F. asiaticum	NIV	x
IPP140273	Fujian	Nanping	wheat	F. asiaticum	NIV	x
IPP140274	Fujian	Nanping	wheat	F. asiaticum	NIV	x
IPP140275	Fujian	Nanping	wheat	F. asiaticum	NIV	x
IPP140276	Fujian	Nanping	wheat	F. asiaticum	NIV	x
IPP140277	Fujian	Nanping	wheat	F. asiaticum	NIV	x
IPP140278	Fujian	Nanping	wheat	F. asiaticum	NIV	x
IPP140279	Fujian	Nanping	wheat	F. graminearum	15ADON	x
IPP140280	Fujian	Nanping	wheat	F. asiaticum	NIV	x
IPP140281	Fujian	Nanping	wheat	F. asiaticum	NIV	x
IPP140282	Fujian	Nanping	wheat	F. asiaticum	15ADON	x
IPP140283	Fujian	Nanping	wheat	F. asiaticum	NIV	x
IPP140284	Fujian	Nanping	wheat	F. asiaticum	NIV	x
IPP140285	Fujian	Nanping	wheat	F. asiaticum	15ADON	x
IPP140286	Fujian	Nanping	wheat	F. asiaticum	NIV	x
IPP140287	Fujian	Nanping	wheat	F. graminearum	15ADON	x
IPP140288	Fujian	Nanping	wheat	F. graminearum	15ADON	x
IPP140289	Fujian	Nanping	wheat	F. asiaticum	NIV	x
IPP140290	Fujian	Nanping	wheat	F. asiaticum	NIV	x
IPP140291	Fujian	Nanping	wheat	F. asiaticum	NIV	x
IPP140292	Fujian	Nanping	wheat	F. asiaticum	NIV	x
IPP140293	Fujian	Nanping	wheat	F. asiaticum	NIV	x
IPP140294	Fujian	Nanping	wheat	F. asiaticum	3ADON	x
IPP140295	Fujian	Nanping	wheat	F. asiaticum	NIV	x
IPP140296	Fujian	Nanping	wheat	F. asiaticum	NIV	x
IPP140297	Fujian	Nanping	wheat	F. asiaticum	15ADON	x
IPP140298	Fujian	Nanping	wheat	F. asiaticum	NIV	x
IPP140299	Fujian	Nanping	wheat	F. asiaticum	NIV	x
